1 **SOD2 in Skeletal Muscle: New Insights from an Inducible**  
2 **Deletion Model.**

3

4 Aowen Zhuang<sup>1,2,3</sup>, Christine Yang<sup>1</sup>, Yingying Liu<sup>1</sup>, Yanie Tan<sup>1,2</sup> Simon T. Bond<sup>1,2,3</sup>,  
5 Shannen Walker<sup>1,2</sup>, Tim Sikora<sup>1</sup>, Arpeeta Sharma<sup>1</sup>, Judy B. de Haan<sup>1,2,3,4,5</sup>, Peter J.  
6 Meikle<sup>1,2,3</sup>, Melinda T. Coughlan<sup>1,6</sup>, Anna C. Calkin<sup>1,2,3</sup> & Brian G. Drew<sup>1,2,3\*</sup>

7

8 1. Baker Heart & Diabetes Institute, Melbourne, Australia, 3004.

9 2. Central Clinical School, Monash University, Melbourne, Australia, 3004

10 3. Baker Department of Cardiometabolic Health, University of Melbourne, Melbourne,  
11 Australia,

12 4. Department of Physiology, Anatomy and Microbiology, La Trobe University,  
13 Melbourne, Australia, 3083

14 5. Faculty of Science, Engineering and Technology, Swinburne University, Melbourne,  
15 Australia, 3122

16 6. Department of Diabetes, Central Clinical School, Monash University, Melbourne,  
17 Australia, 3004

18

19

20

21 \* Author for correspondence: [brian.drew@baker.edu.au](mailto:brian.drew@baker.edu.au)

22

## 23 **Abstract**

24 Metabolic conditions such as obesity, insulin resistance and glucose intolerance are  
25 frequently associated with impairments in skeletal muscle function and metabolism. This is  
26 often linked to dysregulation of homeostatic pathways including an increase in reactive  
27 oxygen species (ROS) and oxidative stress. One of the main sites of ROS production is the  
28 mitochondria, where the flux of substrates through the electron transport chain (ETC) can  
29 result in the generation of oxygen free radicals. Fortunately, several mechanisms exist to  
30 buffer bursts of intracellular ROS and peroxide production, including the enzymes Catalase,  
31 Glutathione Peroxidase and Superoxide Dismutase (SOD). Of the latter there are two  
32 intracellular isoforms; SOD1 which is mostly cytoplasmic, and SOD2 which is found  
33 exclusively in the mitochondria. Developmental and chronic loss of these enzymes has been  
34 linked to disease in several studies, however the temporal effects of these disturbances remain  
35 largely unexplored. Here, we induced a post-developmental (8-week old mice) deletion of  
36 SOD2 in skeletal muscle (SOD2-iMKO) and demonstrate that 16 weeks of SOD2 deletion  
37 leads to no major impairment in whole body metabolism, despite these mice displaying  
38 alterations in aspects of mitochondrial abundance and voluntary ambulatory movement.  
39 Furthermore, we demonstrated that SOD2 deletion impacts on specific aspects of muscle  
40 lipid metabolism, including the abundance of phospholipids and phosphatidic acid (PA), the  
41 latter being a key intermediate in several cellular signaling pathways. Thus, our findings  
42 suggest that post-developmental deletion of SOD2 induces a more subtle phenotype than  
43 previous embryonic models have shown, allowing us to highlight a previously unrecognized  
44 link between SOD2, mitochondrial function and bioactive lipid species including PA.

45

## 46 **Introduction**

47 Insulin resistance, glucose intolerance and type 2 diabetes are strongly influenced by a  
48 combination of genetics and lifestyle, which is further compounded by the process of ageing<sup>1</sup>.  
49 Many pathways have been identified as contributing determinants of these diseases, however  
50 one of the most consistent, reproducible features amongst them all is mitochondrial  
51 dysfunction<sup>2</sup>. This suggests a direct association between mitochondrial function in peripheral  
52 tissues and the progression of metabolic disease, however which of these conditions is the  
53 primary driving factor remains to be determined. In an effort to tease out this relationship,  
54 studies have suggested that early insults that directly impact on mitochondria, such as  
55 mutations in key mitochondrial genes, promote mitochondrial dysfunction and induce type 2  
56 diabetes<sup>3</sup>.

57

58 When mitochondria are dysfunctional they are often less efficient at generating ATP through  
59 oxidative phosphorylation, and thus several toxic by-products are generated including  
60 excessive amounts reactive oxygen species (ROS). Whilst ROS in normal concentrations are  
61 important cellular signaling molecules, excessive and chronic production of ROS can lead to  
62 deleterious effects including oxidation of proteins and metabolites, mutation of mitochondrial  
63 DNA, inhibition of glycolysis and the promotion of advanced glycation end products<sup>4</sup>.  
64 Fortunately, in a healthy cell several mechanisms exist to buffer these transient bursts of  
65 ROS, including the activity of intracellular enzymes such as Catalase and Glutathione  
66 Peroxidase (Gpx1), and two isoforms of Superoxide Dismutase (SOD); SOD1 and SOD2<sup>5</sup>.

67

68 The ROS buffering capacity of a cell can, however, be significantly reduced by several  
69 mechanisms including mutations in genes important for ROS production or scavenging, or  
70 perturbations to energy substrate metabolism. For example, when a cell is exposed to high

71 levels of glucose, this forces excess substrate through the electron transport chain (ETC),  
72 placing a greater demand on resources<sup>4</sup>. Inevitably, the ETC becomes overloaded and unless  
73 there is an outlet for the increased electrons produced along the pathway such as uncoupling  
74 proteins, they are instead shunted onto molecular oxygen which chemically reduces it to  
75 produce superoxides, or ROS. This increase in ROS further reduces mitochondrial capacity  
76 and thus sets in place a vicious cycle whereby increasing glucose concentrations continues to  
77 elevate levels of ROS, and vice versa<sup>5</sup>.

78

79 Depending on the tissue in which mitochondrial dysfunction and chronic ROS accumulation  
80 occurs, it can manifest in different phenotypes. Chronic increases in ROS promotes  
81 cardiomyopathy, chronic kidney disease and skeletal muscle atrophy and perturbed energy  
82 metabolism<sup>6</sup>. All of these phenotypes are common in the setting of glucose intolerance and  
83 diabetes, suggesting that prevention or treatment of pathways that lead to elevated ROS, is of  
84 potential therapeutic interest.

85

86 Many groups have been interested in the notion that reducing excessive ROS is a means to  
87 preventing disease. Indeed, several pharmaceutical companies have made significant  
88 investments into developing modified antioxidant molecules such as MitoQ, MTP-131 and  
89 SkQ1 that have demonstrated various levels of efficacy in human trials of sarcopenia, cardiac  
90 disease and fatty liver disease<sup>7</sup>. Moreover, preclinical genetic models have elegantly  
91 demonstrated that global overexpression of antioxidant enzymes such as catalase and SOD,  
92 which aid in mopping up excess ROS, have efficacy in preventing endothelial dysfunction,  
93 atherosclerosis, fatty liver, heart disease and glucose intolerance<sup>8,9</sup>. On the contrary, global  
94 genetic deletion of these enzymes induce pathological phenotypes. For example, homozygous  
95 deletion of SOD2 (Mn-SOD), a variant of SOD found exclusively in the mitochondria, led to

96 neonatal lethality<sup>10</sup>. Furthermore, although viable, heterozygous SOD2 mutants present with  
97 many pathologies consistent with mitochondrial dysfunction including poor tolerance to  
98 exercise, cardiomyopathy, cardiovascular disease and glucose intolerance<sup>9,11-15</sup>. Thus,  
99 manipulating cellular ROS either through pharmacological or genetic means appears to  
100 impact on disease outcomes. A potential downside with the majority of studies thus far, has  
101 been the inability to tease out what the tissue specific effects of ROS damage are, which  
102 might aid in improving antioxidant targeting for therapeutic benefit.

103

104 One enzyme studied for its tissue specific effects is SOD2, with liver<sup>16</sup>, brain<sup>17</sup>, adipose<sup>18</sup>,  
105 heart<sup>19</sup>, smooth muscle<sup>20</sup> and skeletal muscle<sup>14,15</sup> specific models all having been generated  
106 and phenotyped. Interestingly, the skeletal muscle specific studies have demonstrated striking  
107 defects in exercise capacity, muscle strength and mitochondrial activity, similar to what has  
108 been observed in whole body models<sup>14,15</sup>. An important point to note is that these prior  
109 models deleted SOD2 during early development, raising questions as to whether the observed  
110 phenotypes were due to increased mitochondrial ROS in fully matured muscle *per se*, or  
111 whether in fact the loss of SOD2 and a subsequent increase in ROS in the developmental  
112 stages, impacted skeletal muscle development directly. Thus, studies which aim to understand  
113 the effect of SOD2 deletion in skeletal muscle post-development, stand to overcome this  
114 limitation and shed new light on our understanding of this pathway.

115

116 In this study we investigated the molecular and metabolic effects of SOD2 deletion from the  
117 musculature in post-developmental male mice from 8 weeks of age.

## 118 **Results**

### 119 **Generation and validation of post-developmental, skeletal muscle specific SOD2-knock** 120 **out mice**

121 To generate mice with deletion of SOD2 in skeletal muscle post-development, we crossed  
122 SOD2 floxed (SOD2 fl/fl) mice with ACTA1-creERT2 (mCre) mice. The resulting SOD2  
123 fl/fl and fl/fl-creERT2 (fl/fl-mCre) male mice were subsequently administered Tamoxifen  
124 (TAM; 80mg/kg) in sunflower oil treated by gavage, or with sunflower oil alone for 3  
125 consecutive days at approximately 8 weeks of age to activate cre-recombinase. Mice were  
126 then fed a high fat diet for the subsequent 12 weeks to metabolically stress the animals. A  
127 separate cohort of fl/fl and fl/fl-mCre mice were treated with tamoxifen, and fed a normal  
128 chow diet for 12 weeks (no vehicle control mice for chow study). High fat diet (HFD) mice  
129 underwent a comprehensive phenotyping regimen over the 12-week period before collecting  
130 tissues at the end of the study following a 6 hour fast. Blood and tissues were also collected  
131 from chow fed mice at study end.

132

133 Using qPCR analysis (see **Table 1** for qPCR primers sets) on muscle acquired from HFD fed  
134 mice, we demonstrated that cre-recombinase expression was specific to skeletal muscle, with  
135 no expression detected in liver or white adipose tissue (WAT) (**Figure 1A**). Moreover, SOD2  
136 mRNA expression was almost completely ablated in skeletal muscle, whereas no change was  
137 observed in liver or WAT (**Figure 1B**). To investigate the effect of cre-lox activity in  
138 different muscle tissues, we investigated cre-recombinase and SOD2 mRNA expression in a  
139 mixed fibre-type muscle (*Tibialis anterior* – TA), a red fibre-type muscle (*soleus*) and a  
140 white fibre-type muscle (*Extensor digitorum longus* – EDL). These results demonstrate that  
141 cre-expression appears to be lower in the *Soleus* red muscle fibre type compared to TA and  
142 EDL (**Figure 1C**), however the deletion of SOD2 was equivalent between all three muscle

143 types (**Figure 1D**), validating SOD2-deletion in all muscle types. To confirm that ablation of  
144 SOD2 mRNA resulted in deletion of the SOD2 protein, we performed western blots on TA  
145 muscles from both chow and high-fat diet (HFD) fed mice. This demonstrated almost  
146 complete ablation of SOD2 in fl/fl-mCre (KO) muscle compared to fl/fl mice (WT) (**Figure**  
147 **1E**).

148

149 Upon demonstrating that SOD2 mRNA and protein was specifically deleted in the skeletal  
150 muscles of fl/fl-mCre mice, we next sought to investigate the effect of SOD2 deletion on  
151 readouts of redox regulation in skeletal muscle. This was performed on three different  
152 muscles (TA, EDL and Soleus) from HFD fed animals, across all 4 groups of mice;  
153 WT+OIL, mCre+OIL, WT+TAM and mCre+TAM. We initially performed gene expression  
154 analysis using qPCR for known enzymes that are involved in redox regulation including *Nrf2*,  
155 *p47Phox*, *p22Phox* and *Nox2* (**Figures 1F-H**). These genes were largely unaffected by the  
156 deletion of SOD2 (dark blue bars), except for *Nox2* which was significantly increased in TA  
157 of KO mice (**Figure 1H, dark blue bar**), whilst *Nrf2* and *p47phox* showed a trend to be  
158 increased in the EDL of KO mice (**Figure 1G, dark blue bar**). No genes were altered by the  
159 deletion of SOD2 in the soleus, although it did appear that Tamoxifen treatment alone  
160 induced a general reduction in each of the genes assayed (**Figure 1H, blue bars**).

161

162 Next we investigated the effect of SOD2 deletion on the abundance of reactive oxygen  
163 species (ROS), and downstream products known to be altered by oxidative stress. **Figure 1I**  
164 shows the abundance of 4-hydroxynonenal (4HNE) protein adducts as determined by  
165 Western blot, which are often generated as a result of increased free radicals. Skeletal muscle  
166 deletion of SOD2 resulted in a reduction of 4HNE staining in TA muscles from both chow  
167 and HFD fed animals, which was significantly ( $p=0.004$ ) different in the HFD fed animals

168 **(Figure 1J)**, indicating a reduced protein peroxidation in the absence of SOD2. We also  
169 performed a direct measure of peroxides (e.g. H<sub>2</sub>O<sub>2</sub>) in the TA muscles using an Amplex Red  
170 Assay, which demonstrated an increase in the abundance of peroxides in the skeletal muscle  
171 of HFD fed animals compared to chow fed animals. However, SOD2 KO did not have any  
172 impact on peroxide abundance **(Figure 1K)**, which is somewhat surprising given that the role  
173 of SOD2 is to convert mitochondrial superoxides and thus one might have expected a  
174 decrease in peroxide concentration in the absence of SOD2. Given there was no change in the  
175 level of peroxide in SOD2 KO compared to WT HFD fed mice, this would suggest that the  
176 majority of peroxide generated in this setting are not derived from the mitochondria, and is  
177 likely impacted by alterations in other enzymes including SOD1. Finally, we measured the  
178 amount of nitrotyrosine products generated in TA muscles of WT and SOD2-KO (mCre)  
179 HFD fed mice. This demonstrated a ~2-fold increase in positive staining for nitrotyrosine in  
180 muscle sections of SOD2 KO muscle (p<0.05; **Figure 1L**), suggestive of increased  
181 superoxide levels in SOD2 KO that lead to increased protein nitration via peroxynitrite  
182 intermediates. Together, these data confirm that post-developmental deletion of SOD2 leads  
183 to alterations in redox readouts in skeletal muscle, with nitrotyrosine noticeably increased in  
184 KO muscles.

185

### 186 **Inducible, muscle specific knock out of SOD2 has no effect on body mass or organ** 187 **weights**

188 Upon demonstrating successful generation of muscle specific SOD2 KO mice with mild  
189 alterations to redox homeostasis, we sought to investigate if feeding these mice a HFD led to  
190 genotype specific alterations in body mass and tissue weights. Weekly analysis of body  
191 weight revealed that KO mice (mCre+TAM) had a similar weight gain over the 12 week  
192 study compared to the three control models (WT+OIL, mCre+OIL, WT+TAM) **(Figure 2A)**.



193 This was confirmed by EchoMRI that demonstrated no difference in lean mass (**Figure 2B**)  
194 or fat mass (**Figure 2C**) between all groups at any of the timepoints measured; however, it  
195 did demonstrate marked increase in fat mass in all models in response to HFD, as expected.  
196 With regard to organ weights at study end, we demonstrated no difference in EDL (**Figure**  
197 **2D**), TA (**Figure 2E**), liver (**Figure 2F**) or gonadal white adipose tissue (gWAT) (**Figure**  
198 **2G**) weight across the four cohorts. Overall, these data demonstrated that inducible, muscle  
199 specific SOD2 KO does not alter body mass or tissue weights in mice fed a HFD for 12  
200 weeks.

201

202 **Inducible, muscle specific knock out of SOD2 alters ambulatory movement behaviour,**  
203 **but does not affect glucose tolerance**

204 After demonstrating that inducible deletion of SOD2 in skeletal muscle had no effect on total  
205 body mass or organ weights, we sought to determine if subclinical changes in metabolism  
206 and movement behavior were apparent in these mice. To study these outputs, we placed the  
207 WT+TAM and mCre+TAM cohorts in a Promethion High-Definition Multiplexed  
208 Respirometry System both prior to commencement of diet (baseline) and after 10 weeks of  
209 HFD feeding (End HFD). The Promethion system performs repeated measures of whole body  
210 respiration, activity behavior and daily movement of individual mice across the entire 24-  
211 hour analysis period. These studies demonstrated that the respiratory exchange ratio (RER)  
212 between the two genotypes was not different at any particular period over the 24 hours  
213 (**Figure 3A**). There was also no difference in RER between genotypes at baseline or after  
214 HFD (**Figures 3B&3C**), or in energy expenditure (EE) (**Figures 3D&3E**). However, as  
215 expected there was a drop in the RER observed between baseline and HFD, particularly  
216 during the night period (~0.85 to 0.78 at light, ~0.93 to 0.6 at dark, for NC vs HFD  
217 respectively), consistent with the animals using more fat for energy production. HFD feeding

218 also coincided with an increased EE after HFD feeding compared to baseline, which was  
219 particularly noticeable during the light cycle, likely reflecting the high-energy content of the  
220 diet they were consuming.

221

222 Further to respiration and energy expenditure measures, the Promethion system is able to  
223 provide insights into animal behavior and ambulatory movement. We observed a noticeable  
224 shift in the times and pattern of active movement in the KO mice compared to WT mice  
225 (**Figure 3F**). In this panel, it was observed that KO animals tended to do more intense  
226 movement early on in the night cycle, when they first wake, compared to WT mice.  
227 Following this bout of movement, they tended not to move again substantially until the end of  
228 the night cycle, which then continued well into the early part of the day cycle. These altered  
229 behaviors encouraged us to investigate this finding further, and thus we studied their  
230 locomotion and exercise behaviours. To do this we compared the distance and speed at which  
231 they travelled on the running wheel at the start of the study (baseline), with that at the end of  
232 the study (end of HFD). This was performed for both genotypes and separated into light and  
233 dark activity cycles. Thus, if the distance and speed the mice covered was the same at the  
234 beginning and the end of the study, the “delta” would be zero. We demonstrated that there  
235 was no difference in the distance both genotypes ran at the start and the end of study during  
236 the day time cycle (**Figure 3G**), nor was there a difference in WT mice in the night time  
237 cycle. However, there was a strong trend for a reduced distance covered by KO mice in wheel  
238 distance in the night time cycle, as indicated by the negative delta. With regards to wheel  
239 speed, we demonstrated that both genotypes were unable to maintain the same speed at the  
240 end of the study compared to their baseline speeds (perhaps due to the HFD), however there  
241 was a noticeable and robust decline in wheel speed in the KO mice in the nighttime cycle

242 compared to WT mice (**Figure 3H**). These data collectively demonstrate that KO mice have a  
243 decline in the capacity to travel the same distance, and at the same speed as WT mice.

244

245 Another measure we can obtain from Promethion is positional probability mapping, which  
246 uses data collected over the entire analysis period to estimate cumulative animal movement  
247 behaviours. This analysis demonstrated that KO mice spend more time “lounging” in specific  
248 regions of the cage for long periods of time than WT mice (**Figure 3I and 3J**). This can be  
249 observed both in the day time (**Figure 3I**), where less lounge spots for the KO mice indicate  
250 longer time spent in the one spot, and at night time (**Figure 3J**) where the KO mice spend far  
251 less time near the wheel and closer to lounge spots. In an attempt to quantify these  
252 observations, we used behavioral transition analysis to infer the percent of time the different  
253 genotypes spent doing each activity (**Figure 3K&3L**). The propensity for KO mice to take a  
254 long lounge (llnge) appeared to be more apparent after they had either eaten food, drank  
255 water or undertaken exercise (KO vs WT: 41% vs 26%, 36% vs 25%, 59% vs 24%  
256 respectively), suggestive of fatigue (increased percentage shown in red). Indeed, WT mice  
257 were more likely to take a short lounge (slnge) after eating or drinking, supporting the notion  
258 that KO mice were more lethargic and less willing to stay active after these activities.

259

260 To determine whether these alterations in ambulatory movement and animal behavior  
261 impacted on metabolism of energy substrates in these mice, we assessed their whole body  
262 glucose regulation. At baseline there were no differences in either basal fasting glucose  
263 (**Figure 3M**), or in their tolerance to a standardized bolus of glucose (**Figure 3N**). Indeed,  
264 this remained similar throughout the HFD feeding regimen where, despite glucose tolerance  
265 deteriorating as expected over the HFD feeding period, it remained similar between the KOs  
266 and all three control models at both 4 weeks and 12 weeks post diet (**Figures 3O-3R**). Thus,

267 although the movement and behavior of the KO mice was altered, this did not appear to  
268 impact on glucose tolerance in these animals, even following a 12-week HFD challenge.

269

### 270 **Inducible, muscle specific knock out of SOD2 induces changes in skeletal muscle** 271 **mitochondrial composition**

272 Given that SOD2 is localized to the mitochondria, and that we observed phenotypes in KO  
273 mice that were reminiscent of lethargy that is often observed in models with mitochondrial  
274 deficits, we performed experiments to test aspects of mitochondrial activity. We initially  
275 performed analysis on the abundance of mtDNA in the TA muscle of all four cohorts from  
276 the HFD study (**Figure 4A**). These data demonstrated that mtDNA abundance was not  
277 different between KO mice and the various control cohorts. Next, we performed Western blot  
278 analysis on the TA muscles from WT+TAM and mCre+TAM animals fed both chow and  
279 HFD to investigate the abundance of representative proteins from each of the five complexes  
280 of the electron transport chain (ETC) (**Figure 4B**). These data demonstrated that SOD2 KO  
281 mice had a substantial reduction in the abundance of both Complex I and Complex II proteins  
282 of the ETC (**Figure 4C**). Moreover, although not significant, there was a notable trend for a  
283 reduction in all other complexes of the ETC. Given the robust reductions in ETC complex I  
284 and II, we performed gene expression analysis on the three different muscle types (TA, EDL,  
285 Soleus) from all four cohorts of mice that were fed a HFD, to determine if this phenotype  
286 might be driven by transcriptional changes in mitochondrial genes (**Figures 4D-4F**). These  
287 data demonstrated that although some genes were modestly changed in KO TA muscles (e.g.  
288 *Ppargc1a* and *Ndufs1*), overall the expression of key mitochondrial genes was not altered by  
289 deletion of SOD2. These findings indicated that key components of the mitochondrial ETC  
290 were reduced in SOD2 KO skeletal muscles, but this was not due to changes in mtDNA

291 abundance or changes in gene transcription, suggesting a post-translational effect on ETC  
292 complex abundance in this model potentially due to altered redox homeostasis.

293

294 **Inducible, muscle specific knock out of SOD2 alters pathways involved in energy**  
295 **substrate utilisation.**

296 Given the subtle alterations in mitochondrial readouts, we speculated whether SOD2 KO  
297 mice might also demonstrate changes in pathways that regulate skeletal muscle energy  
298 metabolism. A well-described regulator of skeletal muscle energy metabolism is AMP  
299 activated protein kinase (AMPK), which alters both glucose and lipid metabolism in the  
300 setting of increased energy demand. We performed Western blots in the TA muscles from  
301 both chow and HFD fed WT and KO mice, which demonstrated that SOD2 KO muscles had  
302 an increased phosphorylation of the AMPK $\alpha$  subunit at the Thr172 activation site,  
303 compared to WT mice (**Figure 5A&5B**). Basal phosphorylation of AMPK was blunted in  
304 WT mice fed a HFD, however the increase in AMPK phosphorylation that was observed in  
305 KO mice fed a chow diet was abolished in KO mice fed a HFD. This result suggested that  
306 loss of SOD2 in a chow setting impacted on metabolic pathways that resulted in an increased  
307 need for energy, perhaps due to loss of mitochondrial efficiency, however this effect was  
308 confounded by the HFD milieu. In an attempt to further investigate the impact on muscle  
309 function, we performed qPCR analysis in the TA, EDL and Soleus muscles. There were no  
310 statistically significant differences in the abundance of any metabolism related genes in the  
311 KO (mCre+TAM) group compared to the three control groups (**Figure 5B-5D**). Moreover,  
312 given previous studies have indicated that developmental loss of SOD2 in skeletal muscle can  
313 lead to alterations in muscle morphology and branching<sup>21</sup>, we subsequently analyzed the  
314 abundance of genes that might suggest changes in these pathways. Our data demonstrated  
315 that there was a change in the abundance of *Mef2c*, *Myog* and *Myod*, which are

316 transcriptional regulators of skeletal muscle myogenesis (**Figure 5B-5D**). Specifically, there  
317 was a trend towards reduced *Mef2C* and *MyoD* in the TA muscle, and in *MyoD* in the EDL.  
318 These findings are consistent with those previously described, and potentially indicate that  
319 SOD2 null muscle has a mild impairment in muscle myogenesis.

320

321 **Inducible, muscle specific knock out of SOD2 alters specific lipid pathways in skeletal**  
322 **muscle tissue.**

323 Finally, given that we have shown that inducible SOD2 deletion in skeletal muscle leads to  
324 subtle changes in mitochondrial and metabolic pathways, we sought to investigate if these  
325 changes affected lipid metabolism. Lipids are important signaling molecules, critical  
326 substrates for energy metabolism, and potent regulators of mitochondrial function. Thus, we  
327 performed ESI-MS/MS lipidomics analysis on muscle homogenates from all four cohorts of  
328 mice fed a HFD, and compared their lipidomes. We first analysed the total abundance of each  
329 of the 33 classes of lipids, which provided a global insight into the skeletal muscle lipidomes  
330 across the cohorts (**Figure 6A**). It was observed that in general the tamoxifen treatment had a  
331 noticeable impact on muscle lipid abundance, with an evident reduction in the abundance of  
332 several classes in mice treated with tamoxifen. This was particularly apparent in the  
333 triglyceride class (TG-SIM and TG-O), where these lipids appeared to be reduced by up to  
334 50% as a response to Tamoxifen (WT+TAM and mCre-TAM cohorts; **Figure 6A**). Whilst  
335 many of the lipid classes were unaffected by the tamoxifen and deletion of SOD2, there were  
336 three particular lipid classes that were significantly reduced by SOD2 deletion, that were  
337 independent of any effects of Tamoxifen itself. These were diacylglycerols (DG), free fatty  
338 acids (FFA) and lysophospholipids (lysophosphatidylcholines - LPC,  
339 lysophosphatidylethanolamines - LPE and lysophosphatidylinositols - LPI). Several

340 phosphate-containing lipid classes also exhibited a trend towards an increase in abundance in  
341 the SOD2 KO muscle, including phosphatidic acids (PA), phosphatidylcholines (PCs) and  
342 phosphatidylethanolamines (PEs). Given the significant differences observed in the DGs and  
343 FFAs, we performed a more in depth analysis of these lipids to investigate the effect of SOD2  
344 KO on the individual species within these classes. We observed that several individual  
345 species of DG were significantly reduced by SOD2 KO, including many of the high  
346 abundance DGs such as those containing 16:χ and 18:χ fatty acids (**Figure 6B**). This was  
347 also reflected in the individual species of FFAs, where significant reductions were also  
348 observed for 4 different species including the 16:χ and 18:χ fatty acids (**Figure 6C**). The  
349 combined change in lysophospholipids demonstrated the global impact that SOD2 KO had on  
350 these lipid classes (**Figure 6D**). Overall, these data demonstrated that SOD2 deletion in  
351 skeletal muscle impacts on specific lipid pathways that are an important energy source for the  
352 mitochondria (i.e. FFAs). Moreover, there appeared to be a global impact on the level of  
353 phospholipids, with a potential activation of the pathways that clear the more toxic  
354 lysophospholipids such as LPC, LPE and LPI, into their acylated stable forms including PC  
355 and PE, a process catalyzed by lysophosphatidylcholine acyltransferase (LPCAT). In  
356 addition, an intriguing observation from these datasets is that the pathway responsible for  
357 conversion of phosphatidic acid (PA) into diacylglycerol (DG), appeared to be substantially  
358 impacted. This was evidenced by an increase in PA (the precursor) abundance and a decrease  
359 in DG (the downstream product) abundance, a reaction that is catalyzed by the enzyme  
360 phosphatidic acid phosphatase (PAP)/Lipin1. In light of these findings, we were interested to  
361 investigate whether we could detect differences in the amount Lipin1 in skeletal muscle of  
362 these animals. Western blotting for Lipin1 in WT and SOD2 KO muscles demonstrated that  
363 there were no alterations in the overall abundance of Lipin1 between WT and KO muscles, in  
364 either chow or HFD fed mice (**Figure 6E**). Collectively, these findings suggest that SOD2

365 either directly or indirectly affects pathways that are involved in the metabolism of lipids,  
366 particularly phosphatidylcholine, providing interesting insights into a previously unexplored  
367 role of SOD2 in skeletal muscle.



## 368 **Discussion**

369 In the current study, we demonstrate that post-developmental, skeletal muscle specific  
370 deletion of SOD2 imparts subtle effects on whole body physiology, which likely manifest as  
371 escalating deficits in mitochondrial function and subsequently energy metabolism. We also  
372 identify previously unrecognised alterations in specific lipid pathways in SOD2 KO muscles,  
373 which potentially define a new area of interest in the SOD2 field.

374

375 Previous studies investigating SOD2 deletion in skeletal muscle have done so either in  
376 heterozygous global null models<sup>12</sup>, or in muscle specific KO models that delete SOD2 whilst  
377 the muscles are still developing in utero<sup>14,15</sup>. Our study is the first to our knowledge that  
378 describes a deletion of SOD2 in skeletal muscle of mice that were already fully developed  
379 (i.e. at 8 weeks of age). Subsequent deletion of SOD2 for approximately 14 weeks (almost  
380 60% of their entire life), did not recapitulate much of the prior phenotypes related to SOD2  
381 deficiency in skeletal muscle, identifying important caveats to previous literature. The failure  
382 for our post-developmental model to recapitulate the robust muscle atrophy/weakness  
383 phenotype and impairments in glucose metabolism described in previous studies, speaks to  
384 the potential important roles of SOD2 in the developing muscle. Even when challenged with  
385 a high fat-diet (HFD), which we demonstrated to drive increases in oxidative damage and  
386 glucose intolerance, SOD2 KO mice did not demonstrate any additional deterioration.

387

388 Instead, the SOD2 KO mice demonstrated a more subtle phenotype, which, upon further  
389 investigation revealed a hereto unrecognised link between SOD2 and lipid metabolism. This  
390 included altered phospholipid (PL) abundance and the availability of important lipid  
391 intermediates such as diacylglycerols (DG) and free fatty acids (FFA). It is plausible that these  
392 pathways may have also been altered in previous models of SOD2 deletion, however it would

393 have been difficult to tease out these subtle effects from the well progressed and  
394 overwhelming atrophy phenotype in those developmental models.

395

396 The alteration in these specific lipid species is intriguing, given that they all form part of a  
397 larger signaling network that regulates metabolism and several other important systems in  
398 skeletal muscle. Central to this network is the reciprocal regulation of phosphatidic acid (PA)  
399 and DG abundance, which is facilitated by opposing actions of PAP/lipin1 (PA → DG) and  
400 diacylglycerol kinase (DGK) (DG → PA)<sup>22</sup>. Several studies have investigated these specific  
401 enzyme complexes in skeletal muscle, all of which have demonstrated consistent phenotypes  
402 with that described in our and other muscle-specific SOD2 deletion studies. The data  
403 presented in our current study, would suggest that loss of SOD2 in skeletal muscle leads to  
404 either a reduction in PAP/Lipin1 activity, an increase in DGK activity, or a combination of  
405 both. Indeed, Lipin1 deficiency in skeletal muscle, which increases PA abundance and  
406 decreases DG abundance, leads to muscle atrophy, impaired autophagy and reductions in  
407 mitochondrial function<sup>23-25</sup>. This is consistent with the lipid alterations and reductions in  
408 mitochondrial protein abundance observed in SOD2 KO muscles. However, our data  
409 demonstrate that Lipin1 levels were not altered by SOD2 KO, which may indicate a lack of  
410 effect of this pathway. A caveat to these findings is that total abundance of Lipin1 is not a  
411 robust readout of activity, and thus other measures of function such as phosphorylation would  
412 strengthen these interpretations.

413

414 With regards to DGK, loss of different isoforms in skeletal muscle appears to impact on  
415 insulin signaling and AMP kinase activity, but not on mitochondrial function. Specifically,  
416 deletion of DGK $\delta$  increases DG levels, which in turn reduces AMPK phosphorylation and  
417 impaired lipid oxidation<sup>26</sup>. In SOD2 KO muscles, we observed decreased DG abundance and

418 increased AMPK phosphorylation (in chow fed mice), consistent with effects described for  
419 DGK pathways. Unfortunately, we do not have data on DGK activity, so we cannot comment  
420 as to whether these pathways are responsible. Nevertheless, we speculate that in developed  
421 skeletal muscle, deletion of SOD2 initially impacts on this PA/DG lipid axis, which  
422 subsequently leads to reductions in mitochondrial function and a worsening lethargy  
423 phenotype, further perpetuating the effect of SOD2 deletion.

424

425 Further support for this PA/DG pathway being instrumental to the SOD2 phenotype, comes  
426 from studies performed in drosophila and *C. elegans*. Lin et al. described alterations in the  
427 DG/PA pathway that impacted on longevity via the ability of PA to activate the mTOR  
428 pathway<sup>27</sup>. These studies also demonstrated that modulation of these pathways resulted in  
429 higher susceptibility to oxidative stress-induced alterations in lifespan. Thus, PA/DG and  
430 oxidative stress may combine to form a critical axis that regulates skeletal muscle health and  
431 lifespan.

432

433 Despite these several lines of evidence, it remains unknown how the loss of SOD2 impacts on  
434 this axis, and perhaps disruption of redox signaling in skeletal muscle could influence PA  
435 levels and enzymes important in these pathways. Recent studies from Neuffer et al. (2020)  
436 have demonstrated this to be a possibility, with studies from their lab linking beta-oxidation  
437 and redox homeostasis with Lipin1 activity and insulin resistance<sup>28,29</sup>. It is also possible that  
438 these proteins somehow interact with each other or within similar complexes, which might  
439 alter their activity or substrate availability. However, preliminary investigations from our  
440 group using deposited open-access protein-protein interaction datasets do not support this  
441 hypothesis (not shown), with no evidence for a direct or secondary interaction between these  
442 proteins. Another possibility is that loss of SOD2 subtly alters respiratory kinetics locally at

443 the mitochondrial membrane, which secondarily impacts substrate and lipidome abundance  
444 within the mitochondria, leading to noticeable effects on cellular function over time. A recent  
445 study demonstrated that skeletal muscle specific loss of the enzyme Phosphatidylserine  
446 Decarboxylase (PSD), which synthesizes mitochondrial phosphatidylethalamines (PE),  
447 leads to striking defects in mitochondrial and muscle function<sup>30</sup>. This loss of PE resulted in  
448 increased production of ROS from the mitochondria, implicating ROS as being important to  
449 this phenotype. Although we do not observe alterations in PE levels in this model, these data  
450 provide a direct role for mitochondrial lipids in regulating respiratory efficiency.

451

452 Overall, our data provide previously unrecognized effects of SOD2 deletion in skeletal  
453 muscle. Whilst our whole body analyses demonstrate only moderate impacts of post-  
454 developmental deletion of SOD2 on some aspects of metabolism and muscle function  
455 compared to previous literature, our lipidomics analysis revealed intriguing alterations to the  
456 PA/DG pathway - providing a new link between redox biology and mitochondrial function.  
457 An obvious limitation to our current study is the short time frame over which we studied the  
458 animals, and had we allowed the animals to age for a longer period, a more robust phenotype  
459 may have developed. Moreover, we only challenged the animals with a HFD and no other  
460 interventions such as intense exercise training or muscle strain. Indeed, the HFD may not  
461 have been sufficient to precipitate the appropriate stress to accelerate disease. Conversely,  
462 had we utilized a more accelerated disease model, we may not have observed some of the  
463 subtle effects on lipid metabolism. Nevertheless, our current data provide unique insights into  
464 the underlying mechanisms by which SOD2 functions in skeletal muscle, highlighting  
465 previously unexplored interactions with specific lipid pathways important in development  
466 and disease.

## 467 **Methods**

### 468 **Animals**

469 All animal experiments were approved by the Alfred Research Alliance (ARA) Animal  
470 Ethics committee (E/1618/2016/B) and performed in accordance with the research guidelines  
471 set out by the National Health and Medical Research Council of Australia. SOD2 deletion  
472 was achieved using the Cre-Lox system. For inducible, skeletal muscle specific ablation,  
473 SOD2 floxed mice (C57BL/6J, a kind gift from Prof Takahiko Shimizu, Chiba University,  
474 Japan) were crossed with ACTA1-creERT2 mice (C57BL/6J background, Jackson  
475 Laboratories) to generate male cohorts of SOD2<sup>fl/fl</sup>-ACTA1-creERT2<sup>+/-</sup> (SOD2 mCre) or  
476 SOD2<sup>fl/fl</sup>-ACTA1-creERT2<sup>-/-</sup> (SOD2 WT). All mice were bred and sourced through the ARA  
477 Precinct Animal Centre and randomly allocated to groups. Cohorts of SOD2 mCre and WT  
478 mice were aged to 6-8 weeks of age before receiving oral gavage for 3 consecutive days of  
479 either Tamoxifen (80mg/kg) in sunflower oil, or sunflower oil alone. Following gavage, mice  
480 were left to recover for 2 weeks before being placed on high fat diet (43% energy from fat,  
481 #SF04-001 Specialty Feeds) for 12 weeks, or remained on normal chow diet (normal rodent  
482 chow, Specialty Feeds, Australia). Animals were housed at 22°C on a 12hr light/dark cycle  
483 with access to food and water *ad libitum* with cages changed weekly. At the end of the study  
484 mice were fasted for 4-6 hours and then anesthetized with a lethal dose of ketamine/xylazine  
485 before blood and tissues were collected, weighed and frozen for subsequent analysis.

486

### 487 **Tissue Sections and Nitrotyrosine Immunohistochemistry**

488 TA muscles were carefully dissected and cut cross sectionally through the widest part of the  
489 muscle tissue. One half of the TA was embedded cut side down in OCT before being frozen  
490 in a bath of isopentane submerged in liquid nitrogen vapour. After freezing, blocks were  
491 brought to -20°C and 5µm sections were cut using a Leica Cryostat and then subjected to

492 immunohistochemical staining for nitrotyrosine as described previously<sup>31</sup>. Briefly, mounted  
493 sections of TA muscle were fixed with cold acetone, and endogenous peroxidases were  
494 inactivated with 3% H<sub>2</sub>O<sub>2</sub> in Tris-buffered saline. Sections were pre-blocked with a biotin-  
495 avidin blocking kit (Vector Laboratories) and then incubated with the nitrotyrosine antibody  
496 (Merck Milipore; 1:200) overnight at 4°C. Subsequent secondary antibody, biotinylated anti-  
497 rabbit immunoglobulin 1:100 (Dako) was added for 30 min, followed by horseradish  
498 peroxidase–conjugated streptavidin, diluted 1:500 (Dako), and incubated for 30 min in 3,3'-  
499 diaminobenzidine tetrahydrochloride (DAB) (Sigma-Aldrich). Images were captured on an  
500 Olympus Slide scanner VS120 (Olympus) and viewed in OlyVIA (Olympus, build 13771)  
501 and quantitated using a singular threshold setting in Fiji across all samples<sup>32</sup>.

502

### 503 **Peroxide Abundance using Amplex Red Assay**

504 Muscle peroxide abundance was determined using the Amplex Red assay, as previously  
505 described<sup>33</sup>. Briefly, TA muscle tissue was homogenised using 20mM HEPES buffer  
506 (containing 1mM EGTA, 210mM Mannitol and 70mM sucrose). After normalising protein  
507 concentration using a BCA assay (Pierce BCA assay kit), the quantification of hydrogen  
508 peroxide was determined using the Amplex Red Hydrogen Peroxide/Peroxidase Assay Kit  
509 (Molecular Probes) as per the manufacturer's instructions.

510

### 511 **Glucose Tolerance Tests**

512 Oral glucose tolerance tests (oGTT) were performed at different time points (0, 4 and 12  
513 weeks post-HFD) throughout the study period at a dose of 1.5g/kg lean mass as determined  
514 by EchoMRI. All oGTTs were performed after a 5 hour fast as previously described<sup>34</sup>.

515

### 516 **EchoMRI**

517 Body composition was analysed using the 4-in1 NMR Body Composition Analyzer for Live  
518 Small Animals, according to the recommendations of the manufacturer (EchoMRI LLC,  
519 Houston, TX, USA). This provides measurements of lean mass, fat mass and free water in  
520 living animals as previously described<sup>34</sup>.

521

### 522 **Whole Body Energetics**

523 Mice were placed in the Promethion High-Definition Behavioral Phenotyping System for  
524 Mice (Sable Systems International, North Las Vegas, NV, USA) at 2 weeks post-tamoxifen  
525 (baseline) and 13 weeks post-Tamoxifen (11 weeks post HFD) of age for 3 consecutive days.  
526 Recordings for respirometry including energy expenditure (EE) and respiratory exchange  
527 ratio (RER) were collected over the final 24-hour period.

528

### 529 **Movement and Probability Mapping using Promethion**

530 Behavioural phenotyping was conducted using assessments of activity monitoring (X, Y, Z  
531 beam breaks and wheel revolutions), in combination with food and water intake. The  
532 Promethion EthoScan utility created time and locomotion budgets with behavioural transition  
533 matrices for advanced behaviour analysis. Markov chain behaviour transition probability  
534 matrices were visualised utilising agl (Automatic Graph Layout, Microsoft Research;  
535 <https://rise4fun.com/Ag1/>). Positional probability maps were generated across as an average  
536 of all positional locations during the 24-hour data collection period. Data was analysed and  
537 visualised in R (v3.5.3) with custom R scripts using the open-source SableBase package  
538 (Thomas Forester, 2016, Sable Systems International, Las Vegas, version 1.0).

539

### 540 **SDS-PAGE and Immunoblot**

541 Skeletal muscle was lysed in radio-immunoprecipitation assay (RIPA) buffer supplemented  
542 with protease and phosphatase inhibitors. Matched protein quantities were separated by SDS-  
543 PAGE and transferred to PVDF membranes. Membranes were blocked in 3% skim milk for 2  
544 hours and then incubated with primary antibody overnight at 4°C for the following proteins:  
545 4HNE (Abcam, ab46545),  $\beta$ -actin (Santa Cruz Biotech), Total OXPHOS Rodent WB  
546 Antibody Cocktail (MitoSciences), pan 14-3-3 (Santa Cruz), phospho-T172 AMPKalpha  
547 (Cell Signaling), Lipin-1 (Santa-Cruz Biotech) and total AMPKalpha (Cell Signaling). After  
548 incubation with primary antibodies, membranes were washed and probed with their  
549 respective HRP-conjugate secondary anti mouse or anti rabbit (Biorad) antibodies in 3% skim  
550 milk for 2 hours at room temperature, then visualised with enhanced chemiluminescent  
551 substrate (Pierce). Approximated molecular weights of proteins were determined from a co-  
552 resolved molecular weight standard (BioRad, #1610374). Image Lab Software (Bio-Rad) was  
553 used to perform densitometry analyses, and all quantification results were normalised to their  
554 respective loading control or total protein.

555

#### 556 **Quantitative PCR (qPCR)**

557 RNA was isolated from TA, EDL and Soleus muscles using RNazol reagent and isopropanol  
558 precipitation. cDNA was generated from RNA using MMLV reverse transcriptase  
559 (Invitrogen) according to the manufacturer's instructions. qPCR was performed on 10ng of  
560 cDNA using the SYBR-green method on a QuantStudio 7 Flex Real-Time PCR System,  
561 using primer sets outlined in Table 1. Primers were designed to span exon-exon junctions  
562 where possible, and were tested for specificity using BLAST (Basic Local Alignment Search  
563 Tool; National Centre for Biotechnology Information). Amplification of a single amplicon  
564 was estimated from melt curve analysis, ensuring only a single peak and an expected  
565 temperature dissociation profile were observed. Quantification of a given gene was



566 determined by the relative mRNA level compared with control using the delta-CT method,  
567 which was calculated after normalisation to the housekeeping gene *Ppia* or *Rplp0*.

568

#### 569 **Mitochondrial (mt)DNA to nuclear (n)DNA ratio**

570 TA muscle tissue was homogenised in digestion buffer (100mM NaCl, 10mM Tris-HCl,  
571 25mM EDTA, 0.5% SDS, pH 8.0) and then incubated in Proteinase K (250U/mL) for 1 hour  
572 at 55°C. Following this, total DNA was isolated using the phenol-chloroform extraction  
573 method. A qPCR reaction was then performed on 5ng of total DNA using a primer set that  
574 amplifies the mitochondrial gene mtCO3, and the genomic gene SDHA (see table 1 for  
575 primer sequences). Estimated abundance of each gene was used to generate a ratio of  
576 mitochondrial to nuclear DNA (mtDNA/nDNA), and this ratio was compared between  
577 genotypes.

578

#### 579 **Lipidomics**

580 Lipidomics was performed on approximately 50µg of soluble protein (homogenised and  
581 sonicated) from TA muscles taken from SOD2 WT+OIL, mCre+OIL, WT+TAM and  
582 mCre+TAM using LC electrospray ionisation MS/MS (LC-ESI-MS/MS) on an Agilent 6490  
583 triple quadrupole (QQQ) mass spectrometer coupled with an Agilent 1290 series HPLC  
584 system and a ZORBAX eclipse plus C18 column as previously described<sup>35</sup>.

585

#### 586 **Statistical Analyses**

587 All data were expressed as mean ± standard error of the mean (SEM), except where otherwise  
588 stated (i.e. Figure 6A). Statistical comparisons in animal studies were analyzed by repeated  
589 measures 2-way ANOVA, two-way ANOVA with post-hoc testing, or one-way ANOVA  
590 with po-hoc testing as indicated in figure legends. Lipidomics, tissue analysis and cell based

591 experiments were analyzed by either ANOVA with post-hoc testing (Fishers LSD) where  
592 appropriate, or paired students' t-test unless otherwise stated. Analyses were performed using  
593 PRISM8 software and a p-value of  $p < 0.05$  was considered statistically significant.

594

#### 595 **Data Inclusion and Exclusion Criteria**

596 For animal experiments, phenotyping data points were excluded using pre-determined criteria  
597 if the animal was unwell at the time of analysis, there were technical issues identified (such  
598 as failed data acquisition in Promethion), values were biological implausible (such as  
599 RER=2.0) or data points that were identified as outliers using Tukey's Outlier Detection  
600 Method (1.5IQR below Q1 or 1.5IQR above Q3). If repeated data points from the same  
601 mouse failed QC based on pre-determined criteria, or several data points were outliers as per  
602 Tukey's rule, the entire animal was excluded from that given analysis (i.e. during glucose  
603 tolerance tests, indicating inaccurate dosing with gavage). For in vivo and in vitro tissue and  
604 molecular analysis, data points were only excluded if there was a technical failure (i.e. poor  
605 RNA quality, failed amplification in qPCR, failed injection in mass spectrometer), or the  
606 value was biological improbable. This was performed in a blinded fashion (i.e. on grouped  
607 datasets before genotypes were known).

608

609 **Tables**

| <b>Gene</b>     | <b>Forward primer (5' – 3')</b> | <b>Reverse primer (5' – 3')</b> |
|-----------------|---------------------------------|---------------------------------|
| <i>Nrf2</i>     | CATGATGGACTTGGAGTTGC            | CCTCCAAAGGATGTCAATCAA           |
| <i>Ncf1</i>     | CCGGCTATTTCCCATCCAT             | TCGCTGGGCCTGGGTTAT              |
| <i>Cyba</i>     | AGATCGAGTGGGCCATG               | CTTGGGTTTAGGCTCAAT              |
| <i>Nox2</i>     | AGTGC GTTGTGCTCGACAAG           | CCAAGCTACCATCTTATGGAAAGTG       |
| <i>Cre</i>      | AGGGCGCGAGTTGATAGCT             | GAGCGATGGATTTCCGTCTCT           |
| <i>Sod2</i>     | AGGCTCTGGCCAAGGGAGAT            | CACGCTTGATAGCCTCCAGCA           |
| <i>Tfeb</i>     | GGAGCCAGAGCTGCTTGTTA            | AACAAAGGCACCATCCTCAA            |
| <i>Polg1</i>    | TAGCTGGCTGGTCCAAGAGT            | CGACGTGGAGGTCTGCTT              |
| <i>Cytc</i>     | CAGCTTCCATTGCGGACAC             | CGCTGACAGCATCACCTTTC            |
| <i>Tfam</i>     | AGCTTGTAATGAGGCTTGGA            | AGATGTCTCCGGATCGTTTC            |
| <i>Ndufs1</i>   | CACTCGTTCACCTCAGCTA             | GACGGCTCCTCTACTGCCT             |
| <i>Ppargc1a</i> | TGAGGACCGTAGCAAGTTT             | TGAAGTGGTGTAGCGACCAA            |
| <i>Got2</i>     | ATGGCTGCTGCCTTTCAC              | GATCTGGAGGTCCCATTTCA            |
| <i>Hk2</i>      | GGAACCGCCTAGAAATCTCC            | GGAGCTCAACCAAAACCAAG            |
| <i>Glut1</i>    | GGTGTGCAGCAGCCTGTGT             | CACAGTGAAGGCCGTGTTGA            |
| <i>Cpt1a</i>    | GACTCCGCTCGTCATTC               | TCTGCCATCTTGAGTGGTGA            |
| <i>Cpt1b</i>    | CATCCCAGGCAAAGAGACA             | AAGCGACCTTTGTGGTAGACA           |
| <i>Uvrag</i>    | TTGCACACTGGGCTCTATGA            | TGAACACAAGGGTCATCCAA            |
| <i>Fgf21</i>    | AGATGGAGCTCTCTATGGATCG          | GGGCTTCAGACTGGTACACAT           |
| <i>Vegfa</i>    | AATGCTTTCTCCGCTCTGAA            | CTCACCAAAGCCAGCACATA            |
| <i>Mef2c</i>    | GCCGGACAAACTCAGACATTG           | GGGTTTCCCAGTGTGCTGAC            |
| <i>Myog</i>     | CAACCAGGAGGAGCGGATCTCCG         | AGGCGCTGTGGGAGTTGCATTCACT       |
| <i>Myod</i>     | AGGCCGTGGCAGCGA                 | GCTGTAATCCATCATGCCATCA          |
| <i>Ppia</i>     | AGCCAAATCCTTTCTCTCCAG           | CACCGTGTCTTCGACATCA             |
| <i>Rplp0</i>    | ACCCTGAAGTGCTCGACATC            | ATTGATGATGGAGTGTGGCA            |
| <i>Sdha</i> *   | TGGACCCATCTTCTATGC              | TACTACAGCCCCAAGTCT              |
| <i>mtCO3</i> *  | GCAGGATTCTTCTGAGCGTTCT          | GTCAGCAGCCTCCTAGATCATGT         |

610

611

612 **Table 1**

613 Forward and reverse primer sets for detection of the designated gene using qPCR. (m =

614 mouse). \* indicates primer sets used on DNA, to determine the mtDNA/tDNA ratio.

615

616 **Acknowledgements**

617 We acknowledge funding support from the Victorian State Government OIS program to  
618 Baker Heart & Diabetes Institute. BGD and ACC received support from the National Heart  
619 Foundation of Australia, Future Leader Fellowship scheme (101789 and 100067,  
620 respectively). We thank Prof Takahiko Shimizu from Chiba University, Japan for providing  
621 the floxed-mnSOD mice. We also thank all members of the MMA, LMCD and Metabolomics  
622 laboratories at BHDI for their ongoing contributions.

623

624 **Author contributions**

625 BGD conceived and designed the study, and wrote the manuscript. BGD, AZ, CY, YL, YT,  
626 STB, SW, TS performed all experiments. AS and JBdeH performed and analysed Amplex  
627 Red and Nitrotyrosine assays. PJM provided expertise in lipidomics analysis. MTC provided  
628 access to floxed mice and ongoing research support. ACC provided reagents, experimental  
629 advice and access to resources. All authors read and approved the manuscript.

630

631 **Conflicts of interest**

632 The authors declare that they have no conflicts of interest.

633

634

635 **References**

- 636 1. Wanagat, J. & Hevener, A.L. Mitochondrial quality control in insulin resistance and  
637 diabetes. *Curr Opin Genet Dev* **38**, 118-126 (2016).
- 638 2. Montgomery, M.K. & Turner, N. Mitochondrial dysfunction and insulin resistance: an  
639 update. *Endocrine connections* **4**, R1-R15 (2015).
- 640 3. Trifunovic, A., *et al.* Premature ageing in mice expressing defective mitochondrial  
641 DNA polymerase. *Nature* **429**, 417-423 (2004).
- 642 4. Giacco, F. & Brownlee, M. Oxidative stress and diabetic complications. *Circ Res* **107**,  
643 1058-1070 (2010).
- 644 5. Brownlee, M. The pathobiology of diabetic complications: a unifying mechanism.  
645 *Diabetes* **54**, 1615-1625 (2005).
- 646 6. Kauppila, T.E.S., Kauppila, J.H.K. & Larsson, N.G. Mammalian Mitochondria and  
647 Aging: An Update. *Cell metabolism* **25**, 57-71 (2017).
- 648 7. Andreux, P.A., Houtkooper, R.H. & Auwerx, J. Pharmacological approaches to  
649 restore mitochondrial function. *Nature reviews. Drug discovery* **12**, 465-483 (2013).
- 650 8. Boden, M.J., *et al.* Overexpression of manganese superoxide dismutase ameliorates  
651 high-fat diet-induced insulin resistance in rat skeletal muscle. *American journal of*  
652 *physiology. Endocrinology and metabolism* **303**, E798-805 (2012).
- 653 9. Hoehn, K.L., *et al.* Insulin resistance is a cellular antioxidant defense mechanism.  
654 *Proceedings of the National Academy of Sciences of the United States of America*  
655 **106**, 17787-17792 (2009).
- 656 10. Li, Y., *et al.* Dilated cardiomyopathy and neonatal lethality in mutant mice lacking  
657 manganese superoxide dismutase. *Nature genetics* **11**, 376-381 (1995).
- 658 11. Crane, J.D., *et al.* Elevated mitochondrial oxidative stress impairs metabolic  
659 adaptations to exercise in skeletal muscle. *PloS one* **8**, e81879 (2013).

- 660 12. Kang, L., *et al.* Heterozygous SOD2 deletion impairs glucose-stimulated insulin  
661 secretion, but not insulin action, in high-fat-fed mice. *Diabetes* **63**, 3699-3710 (2014).
- 662 13. Koyama, H., *et al.* Antioxidants improve the phenotypes of dilated cardiomyopathy  
663 and muscle fatigue in mitochondrial superoxide dismutase-deficient mice. *Molecules*  
664 **18**, 1383-1393 (2013).
- 665 14. Kuwahara, H., *et al.* Oxidative stress in skeletal muscle causes severe disturbance of  
666 exercise activity without muscle atrophy. *Free radical biology & medicine* **48**, 1252-  
667 1262 (2010).
- 668 15. Lustgarten, M.S., *et al.* Conditional knockout of Mn-SOD targeted to type IIB skeletal  
669 muscle fibers increases oxidative stress and is sufficient to alter aerobic exercise  
670 capacity. *American journal of physiology. Cell physiology* **297**, C1520-1532 (2009).
- 671 16. Ikegami, T., *et al.* Model mice for tissue-specific deletion of the manganese  
672 superoxide dismutase (MnSOD) gene. *Biochemical and biophysical research*  
673 *communications* **296**, 729-736 (2002).
- 674 17. Izuo, N., *et al.* Brain-Specific Superoxide Dismutase 2 Deficiency Causes Perinatal  
675 Death with Spongiform Encephalopathy in Mice. *Oxidative medicine and cellular*  
676 *longevity* **2015**, 238914 (2015).
- 677 18. Han, Y.H., *et al.* Adipocyte-Specific Deletion of Manganese Superoxide Dismutase  
678 Protects From Diet-Induced Obesity Through Increased Mitochondrial Uncoupling  
679 and Biogenesis. *Diabetes* **65**, 2639-2651 (2016).
- 680 19. Kawakami, S., *et al.* Antioxidant, EUK-8, prevents murine dilated cardiomyopathy.  
681 *Circulation journal : official journal of the Japanese Circulation Society* **73**, 2125-  
682 2134 (2009).

- 683 20. Liu, G., *et al.* Bladder function in mice with inducible smooth muscle-specific  
684 deletion of the manganese superoxide dismutase gene. *American journal of*  
685 *physiology. Cell physiology* **309**, C169-178 (2015).
- 686 21. Ahn, B., *et al.* Mitochondrial oxidative stress impairs contractile function but  
687 paradoxically increases muscle mass via fibre branching. *Journal of cachexia,*  
688 *sarcopenia and muscle* **10**, 411-428 (2019).
- 689 22. Brindley, D.N., Pilquill, C., Sariahmetoglu, M. & Reue, K. Phosphatidate degradation:  
690 phosphatidate phosphatases (lipins) and lipid phosphate phosphatases. *Biochimica et*  
691 *biophysica acta* **1791**, 956-961 (2009).
- 692 23. Zhang, P., Verity, M.A. & Reue, K. Lipin-1 regulates autophagy clearance and  
693 intersects with statin drug effects in skeletal muscle. *Cell metabolism* **20**, 267-279  
694 (2014).
- 695 24. Schweitzer, G.G., *et al.* Loss of lipin 1-mediated phosphatidic acid phosphohydrolase  
696 activity in muscle leads to skeletal myopathy in mice. *FASEB journal : official*  
697 *publication of the Federation of American Societies for Experimental Biology* **33**,  
698 652-667 (2019).
- 699 25. Rashid, T., *et al.* Lipin1 deficiency causes sarcoplasmic reticulum stress and  
700 chaperone-responsive myopathy. *The EMBO journal* **38**(2019).
- 701 26. Jiang, L.Q., *et al.* Diacylglycerol kinase-delta regulates AMPK signaling, lipid  
702 metabolism, and skeletal muscle energetics. *American journal of physiology.*  
703 *Endocrinology and metabolism* **310**, E51-60 (2016).
- 704 27. Lin, Y.H., *et al.* Diacylglycerol lipase regulates lifespan and oxidative stress response  
705 by inversely modulating TOR signaling in *Drosophila* and *C. elegans*. *Aging cell* **13**,  
706 755-764 (2014).

- 707 28. Smith, C.D., Schmidt, C.A., Lin, C.T., Fisher-Wellman, K.H. & Neuffer, P.D. Flux  
708 through mitochondrial redox circuits linked to nicotinamide nucleotide  
709 transhydrogenase generates counterbalance changes in energy expenditure. *The*  
710 *Journal of biological chemistry* **295**, 16207-16216 (2020).
- 711 29. Smith, C.D., *et al.* Genetically increasing flux through beta-oxidation in skeletal  
712 muscle increases mitochondrial reductive stress and glucose intolerance. *American*  
713 *journal of physiology. Endocrinology and metabolism* (2021).
- 714 30. Heden, T.D., *et al.* Mitochondrial PE potentiates respiratory enzymes to amplify  
715 skeletal muscle aerobic capacity. *Science advances* **5**, eaax8352 (2019).
- 716 31. Sharma, A., *et al.* Direct Endothelial Nitric Oxide Synthase Activation Provides  
717 Atheroprotection in Diabetes-Accelerated Atherosclerosis. *Diabetes* **64**, 3937-3950  
718 (2015).
- 719 32. Schindelin, J., *et al.* Fiji: an open-source platform for biological-image analysis. *Nat*  
720 *Methods* **9**, 676-682 (2012).
- 721 33. Sharma, A., *et al.* The nuclear factor (erythroid-derived 2)-like 2 (Nrf2) activator  
722 dh404 protects against diabetes-induced endothelial dysfunction. *Cardiovasc Diabetol*  
723 **16**, 33 (2017).
- 724 34. Bond, S.T., Kim, J., Calkin, A.C. & Drew, B.G. The Antioxidant Moiety of MitoQ  
725 Imparts Minimal Metabolic Effects in Adipose Tissue of High Fat Fed Mice.  
726 *Frontiers in physiology* **10**, 543 (2019).
- 727 35. Huynh, K., *et al.* High-Throughput Plasma Lipidomics: Detailed Mapping of the  
728 Associations with Cardiometabolic Risk Factors. *Cell chemical biology* **26**, 71-84 e74  
729 (2019).
- 730
- 731



732 **Figure Legends**

733

734 **Figure 1: Generation and characterisation of inducible, skeletal muscle specific SOD2**

735 **knock out mice.** mRNA expression of (A) cre recombinase and (B) SOD2 in liver, white  
736 adipose tissue (WAT) and TA muscle of SOD2 WT and mCre mice (n=4/group); (C) Cre  
737 recombinase and (D) SOD2 mRNA expression across three different muscle types (TA,  
738 Soleus and EDL) of WT and mCre positive mice (n=6-11/group); (E) Western blots for  
739 SOD2 and  $\beta$ -actin in TA muscle lysates from WT plus tamoxifen (WT) and mCre plus  
740 tamoxifen (KO) mice fed either a chow or high fat diet (HFD; n=3-4/group). mRNA  
741 expression of redox genes from (F) TA, (G) EDL and (H) soleus muscles from the four HFD  
742 fed cohorts (n=4-11/group); (I) Western blot and (J) quantitation of 4-hydroxynonenal  
743 (4HNE) conjugated proteins from TA of WT plus tamoxifen (WT) and mCre plus tamoxifen  
744 (KO) mice fed either a chow or HFD (n=3-4/group); (K) Skeletal muscle peroxide abundance  
745 as determined by Amplex Red assay in TA muscles from WT and KO chow fed mice and  
746 WT+OIL, mCre+OIL, WT+TAM, mCre+TAM cohorts fed a chow or HFD (n=3-10/group);  
747 (L) Quantification of Nitrotyrosine staining as determined by immunohistochemistry  
748 performed on sections of TA muscles from WT+TAM and mCre+TAM fed a HFD (n=7-  
749 10/group) All data are presented as mean  $\pm$  SEM. Data with >2 groups were compared by  
750 ANOVA with Fishers LSD post-hoc testing, samples with 2 groups were analysed using a  
751 Mann-Whitney non-parametric t-test where \* denotes a p-value<0.05. WAT = white adipose  
752 tissue, TA = *Tibialis anterior*, EDL = *Extensor digitorum longus*, 4HNE = 4-hydroxynonenal  
753 , DAB = 3,3'-Diaminobenzidine; HFD = high fat diet.

754

755 **Figure 2: General features and tissue weights of inducible, skeletal muscle specific KO**

756 **mice.** (A) Weekly total body weight of the four cohorts fed a HFD for 12 weeks (n=4-

757 11/group); **(B)** Lean mass and **(C)** fat mass as determined by EchoMRI in the four HFD fed  
758 cohorts at baseline, 4 weeks, 8 weeks and 12 weeks post-HFD (n=4-11/group); Tissue weight  
759 for **(D)** EDL, **(E)** TA, **(F)** liver and **(G)** gonadal WAT (gWAT) normalized to body weight  
760 (BW) at study end (n=4-11/group). Data are presented as mean  $\pm$  SEM. Data in (A-C) were  
761 analysed using repeated measures two-way ANOVA. All other data were compared by  
762 ANOVA with Fishers LSD post-hoc testing. g = grams, mg = milligrams, wks = weeks, HFD  
763 = high fat diet, TA = *Tibialis anterior*, EDL = *Extensor digitorum longus*, gWAT = gonadal  
764 white adipose tissue, BW = body weight.

765

766 **Figure 3: Measurements of whole body metabolism and glucose tolerance in inducible,**  
767 **muscle specific SOD2 KO mice. (A)** Respiratory exchange ratio (RER) trace from  
768 Promethion analysis over the entire 24 hour assessment period, **(B)** average RER and **(C)**  
769 average energy expenditure (EE) for WT+TAM (light blue) and mCRE+TAM (dark blue)  
770 mice in the light and dark periods; **(D)** Average RER and **(E)** average energy expenditure  
771 (EE) for both genotypes in the light and dark periods prior to study end; **(F)** Total locomoter  
772 activity (pedal and wheel movement) over the 24 hour assessment period at the end of the  
773 HFD feeding study; Change in **(G)** average wheel distance and **(H)** average wheel speed  
774 from baseline to study end during the light and dark cycles; Locality mapping of mice based  
775 on 24 hours of movement data during the **(I)** light cycle (day time) and **(J)** dark cycle (night  
776 time). Map colours indicate increasing time spent in that given location (red being most,  
777 yellow being least). Intense red areas indicate “lounge spots”, likely representing regions  
778 where mice spent time resting for longer periods. Grey boxes designate each fixed cage  
779 component (i.e. wheel, food hopper, water sipper and running wheel). Probability mapping  
780 for **(K)** WT+TAM mice and **(L)** mCRE+TAM mice estimates predicted behavior  
781 (percentage) following a certain activity. Red numbers indicate an increase, whilst blue

782 numbers indicate a decrease in that behavior in KO mice relative to WT mice, *slnge* = short  
783 lounge, *llnge* = long lounge. Fasting blood glucose (FBG) measurement and oral glucose  
784 tolerance tests (oGTT) in mice at (**M, N**) baseline, (**O, P**) 4 weeks post-HFD and (**Q, R**) 12  
785 weeks post-HFD respectively. Data are presented as mean  $\pm$  SEM (B-E, G, H, M-R). Data in  
786 (N, P and R) were compared using repeated measures ANOVA. All other data were  
787 compared by ANOVA with Fishers LSD post-hoc testing where \* indicates a p-value<0.05.  
788 RER = respiratory exchange ratio, EE = energy expenditure, HFD = high fat diet.

789

790 **Figure 4: Analysis of mitochondrial abundance and gene expression in muscles from**  
791 **inducible, skeletal muscle specific SOD2 KO mice.** (A) Mitochondrial DNA (mtDNA) to  
792 nuclear DNA (nDNA) ratio in TA muscles of the four HFD fed cohorts; (B) Western blot on  
793 protein from TA muscles isolated from WT+TAM (WT) and mCre+TAM (KO) mice fed a  
794 chow diet or high fat diet (HFD) for proteins from the 5 complexes (CI-CV) of the  
795 mitochondrial electron transport chain (ETC) and of pan 14-3-3 (loading control). (C)  
796 Quantification of five proteins from complexes of the ETC from panel B, normalized to the  
797 the loading control (14-3-3); qPCR analysis for genes involved in skeletal muscle  
798 mitochondrial function from (D) TA (E) EDL and (F) Soleus muscles from all four cohorts  
799 of HFD fed mice. All data are presented as mean  $\pm$  SEM. All data were compared by  
800 ANOVA with Fishers LSD post-hoc testing where \* indicates a p-value<0.05. TA = *Tibialis*  
801 *anterior*, EDL = *Extensor digitorum longus*.

802

803 **Figure 5: Analysis of AMP kinase activation and skeletal muscle gene expression in**  
804 **muscles from inducible, skeletal muscle specific SOD2 KO mice.** (A) Western blot on  
805 protein from TA muscles isolated from WT+TAM (WT) and mCre+TAM (KO) mice fed a  
806 chow diet or HFD for phosphorylated AMP kinase (pAMPK T172), and total AMP kinase

807 (tAMPK, loading control), and; (B) quantification of pAMPK/tAMPK abundance. qPCR  
808 analysis for genes involved in skeletal muscle metabolism and function from (C) TA (D)  
809 EDL and (E) soleus muscles from all four cohorts of HFD fed mice. Data presented as mean  
810  $\pm$  SEM. All data were compared by ANOVA with Fishers LSD post-hoc testing where \*  
811 indicates a p-value<0.05. HFD = high fat diet, TA = *Tibialis anterior*, EDL = *Extensor*  
812 *digitorum longus*.

813

814 **Figure 6: Analysis of lipid abundance in muscles from inducible, skeletal muscle specific**  
815 **SOD2 KO mice.** Lipidomic assessment of lipid abundance in TA muscles from all four  
816 cohorts of HFD fed mice. (A) Total abundance of the 33 classes of lipid quantified in TA  
817 muscles across the four genotypes. Data are presented as log<sub>2</sub> fold change from WT+TAM  
818 samples using box and whisker plots with black line representing the median, boxes  
819 representing the 25<sup>th</sup> and 75<sup>th</sup> percentile, whiskers represent 10-90<sup>th</sup> percentile whilst  
820 individual dots represent values outside the 10<sup>th</sup> and 90<sup>th</sup> percentile. Heatmaps depicting  
821 abundance ( $\mu$ mol/mg) of individual species of (B) diacylglycerol (DG), (C) fatty acids (FA)  
822 and (D) total abundance of lysophosphatidylcholine (LPC), lysophosphatidylethanolamine  
823 (LPE) and lysophosphatidylinositol (LPI) lipids in TA muscle. Crossed boxes indicate  
824 species that were below the limit of detection. White boxes indicate species that fall below  
825 the lowest unit in the scale. Scale represents red as the highest abundance and light blue as  
826 the lowest abundance within a given range (shown on individual scale bars). (E) Western blot  
827 on protein from TA muscles isolated from WT+TAM (WT) and mCre+TAM (KO) mice fed  
828 a chow or high fat diet for Lipin1 and  $\beta$ -actin. Data in A-D were analysed by ANOVA with  
829 Benjamini-Hochberg correction (applied per sub-analysis) where \* indicates a p-value<0.05.

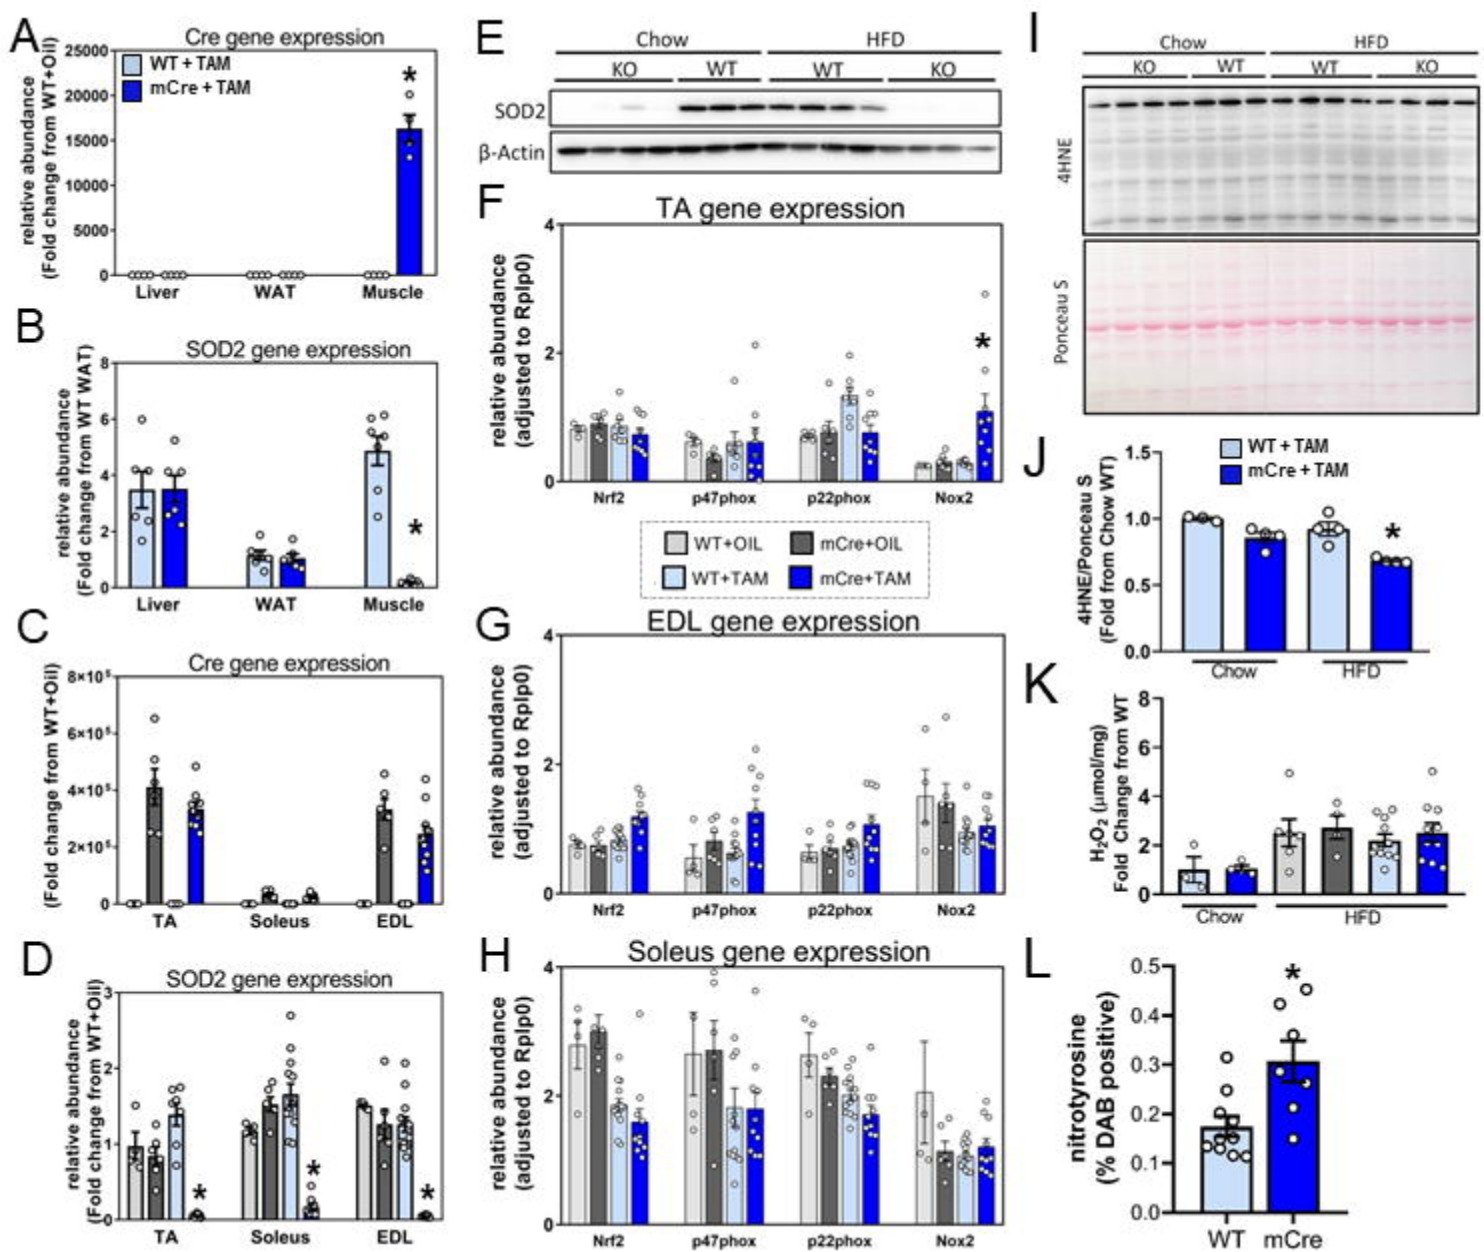

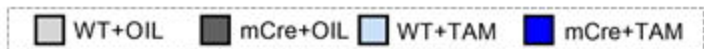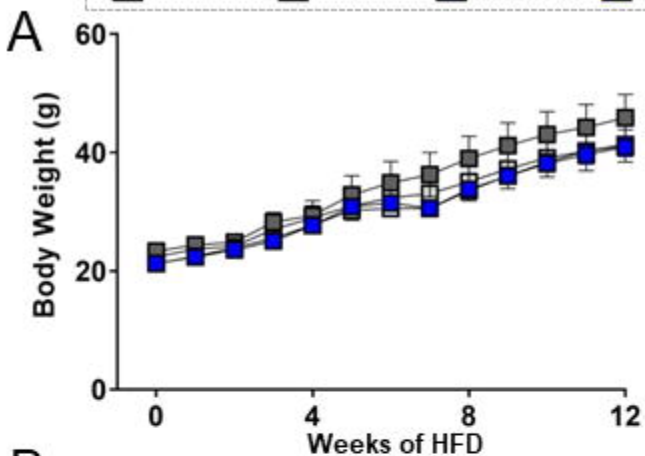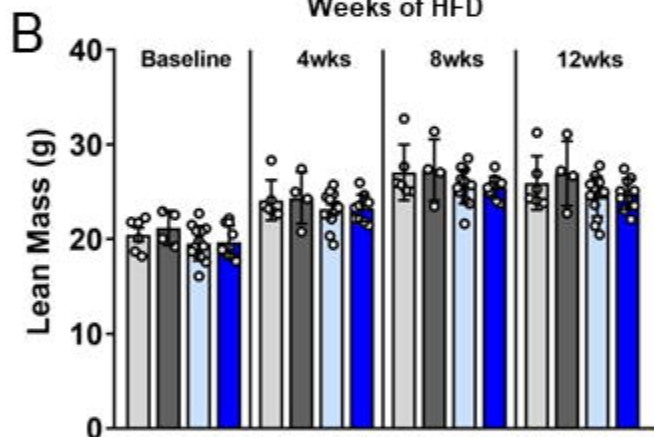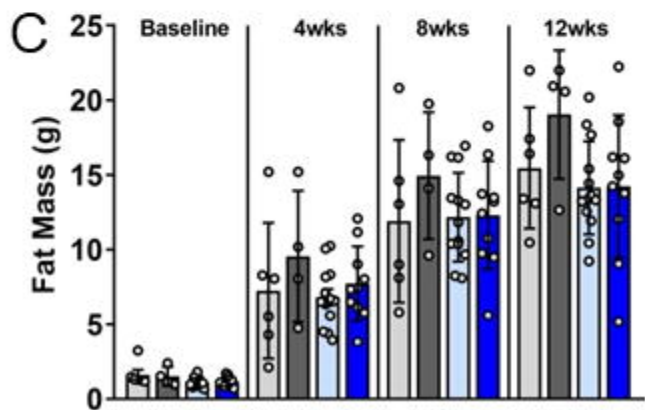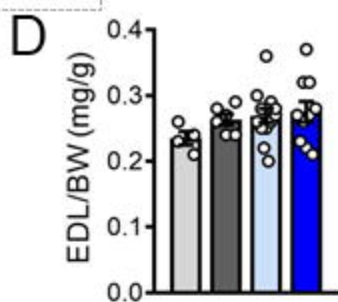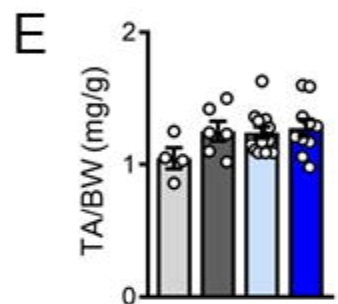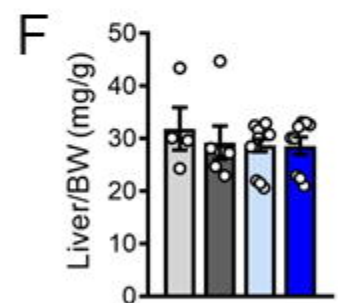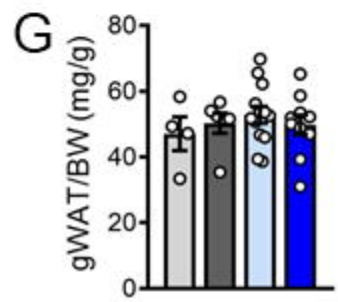

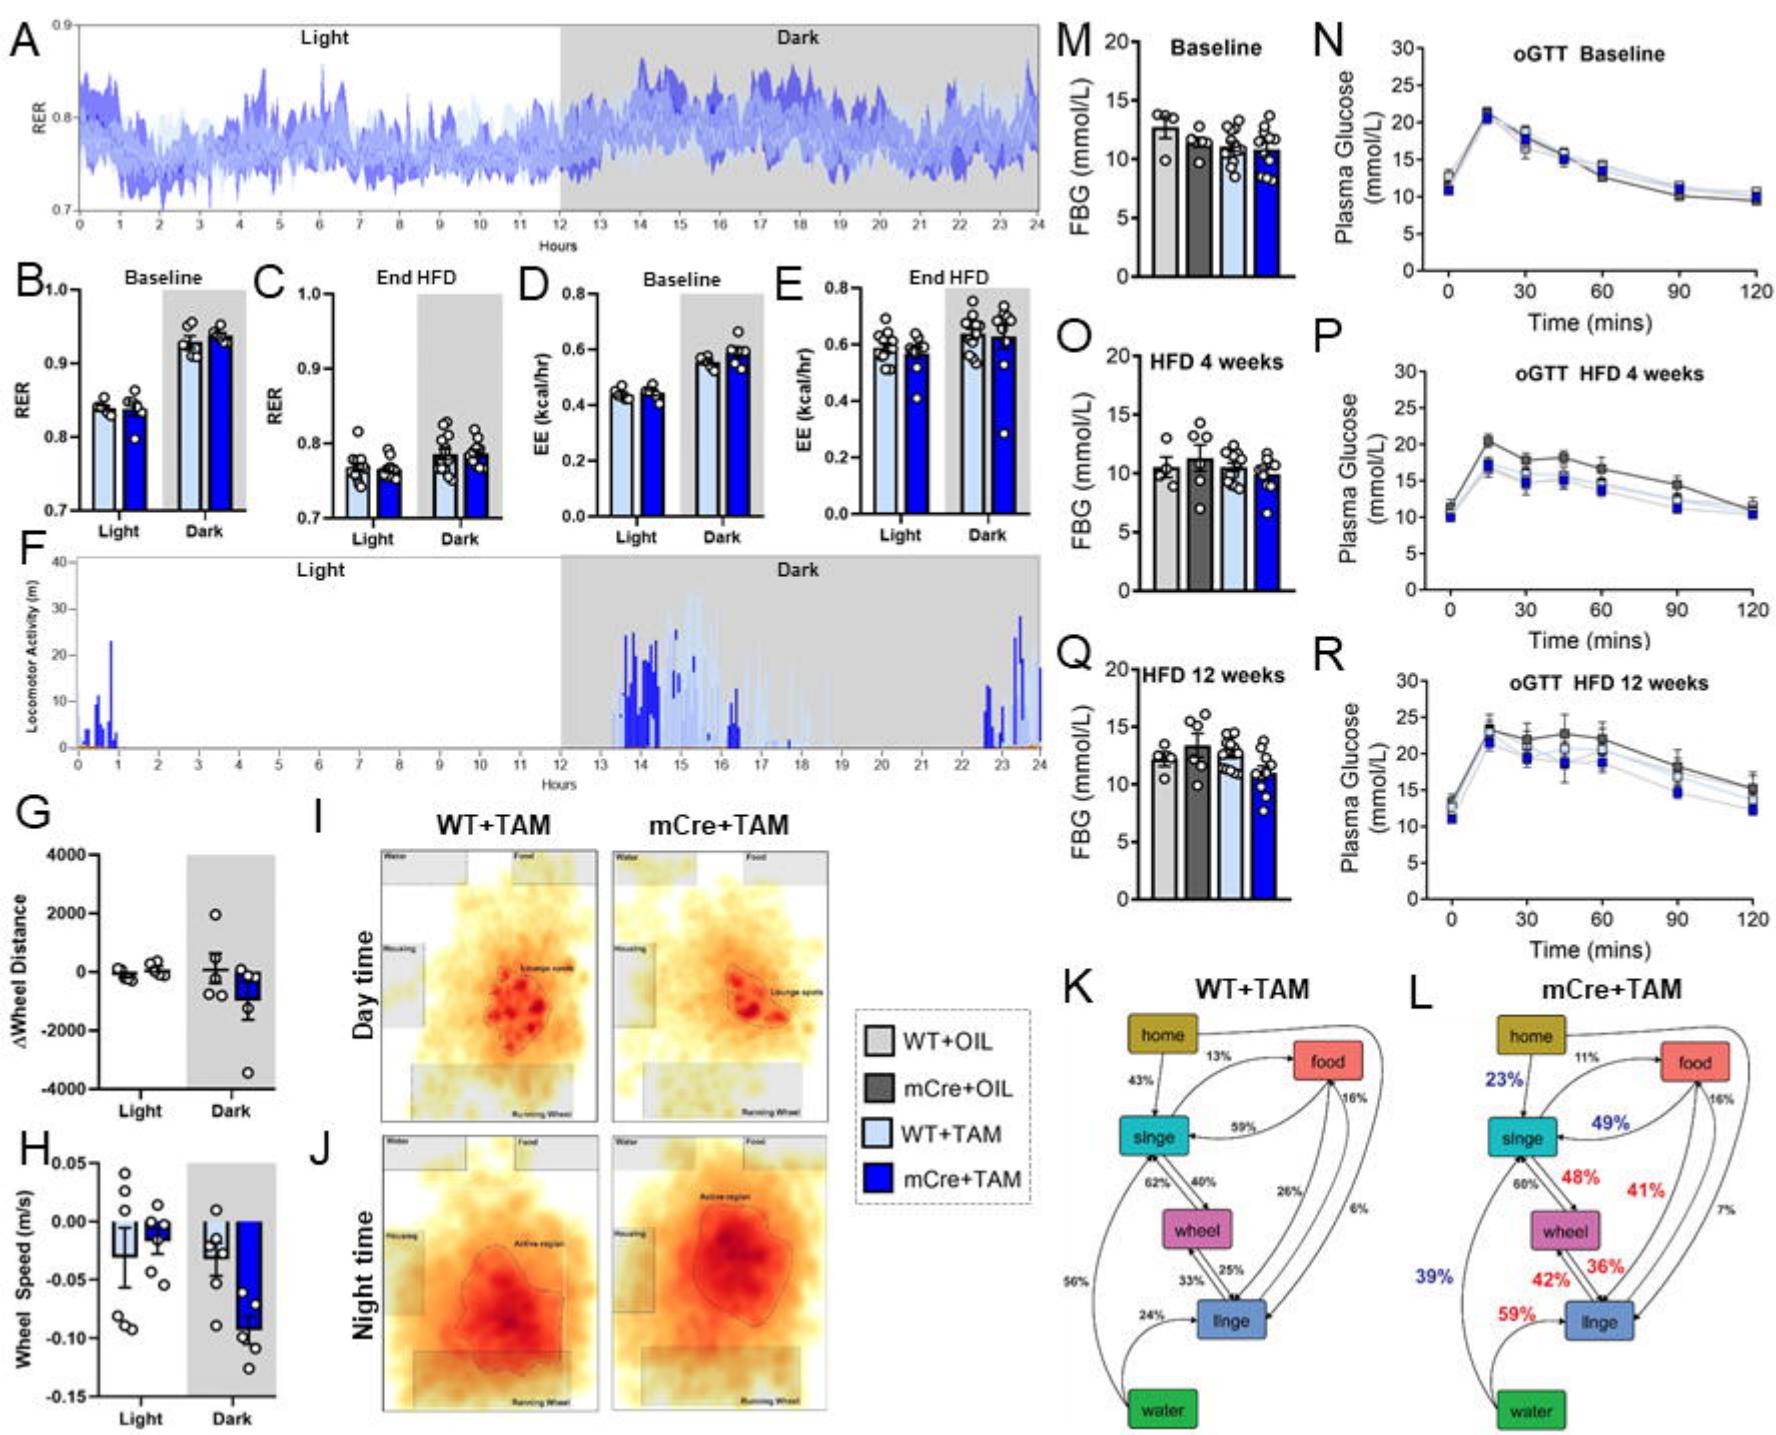

**A**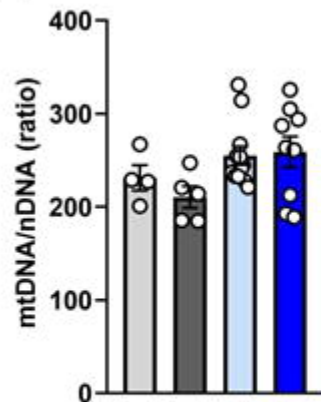**B**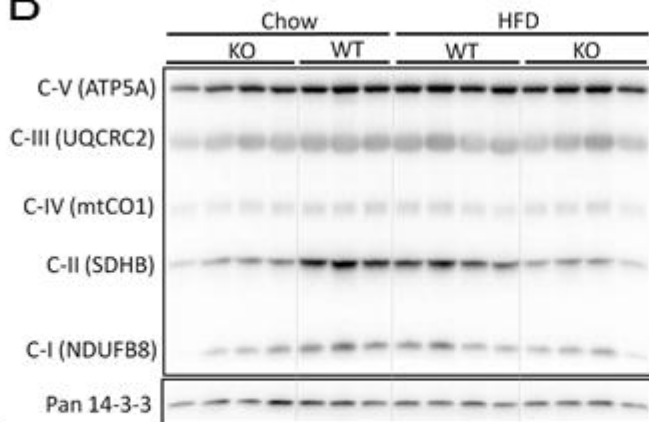**C**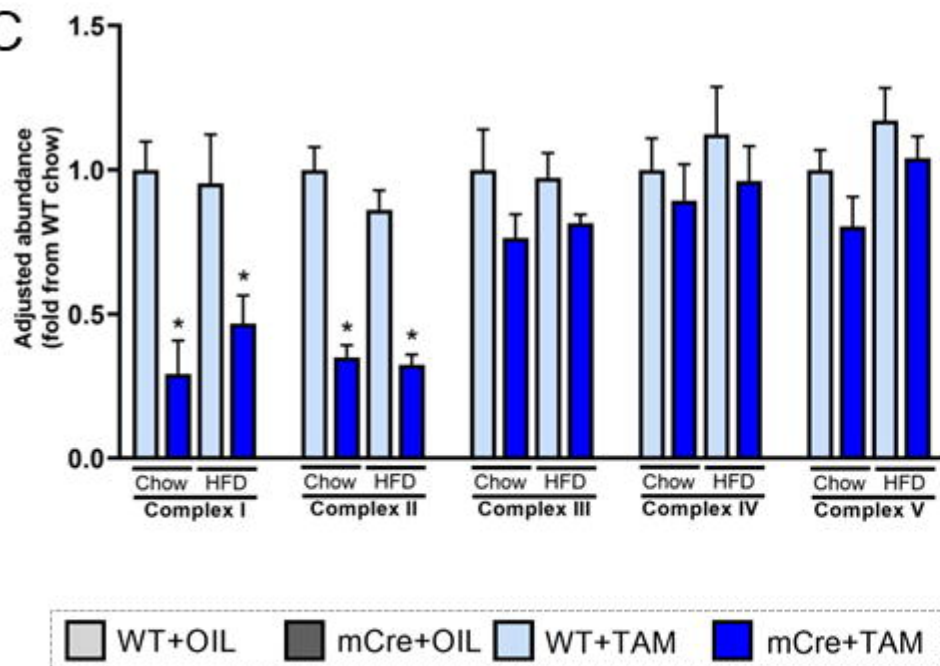**D**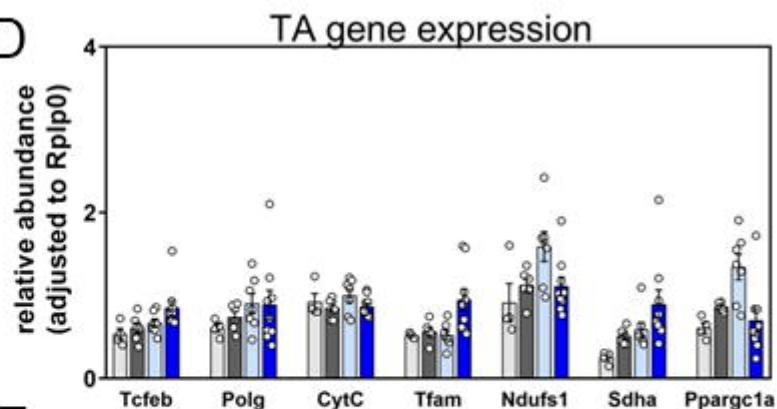**E**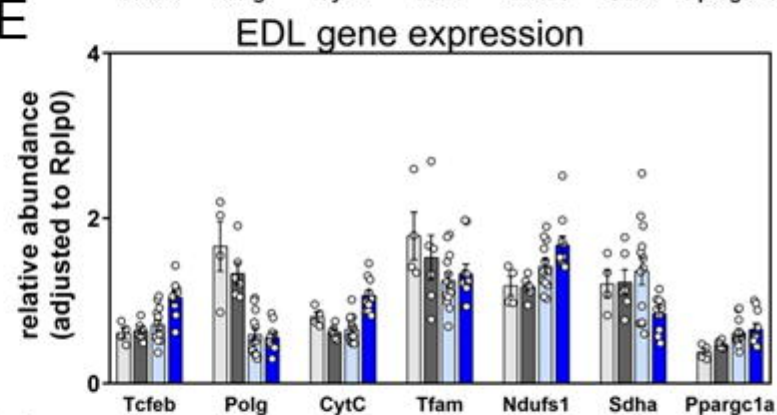**F**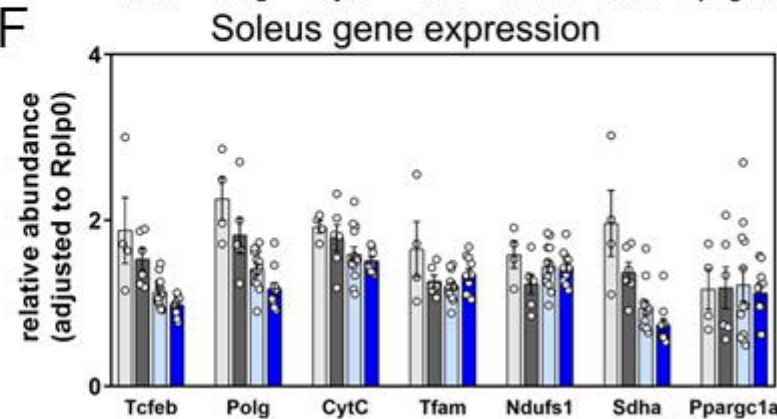



**A**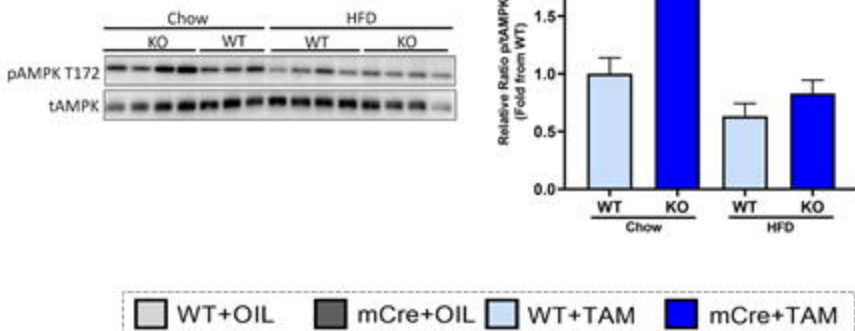**B**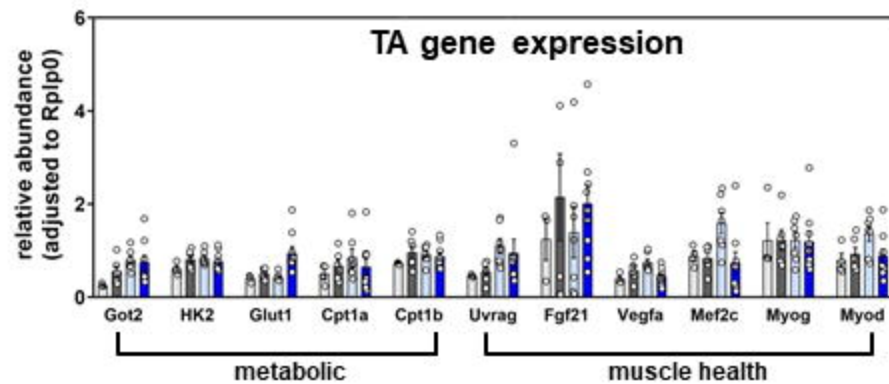**C**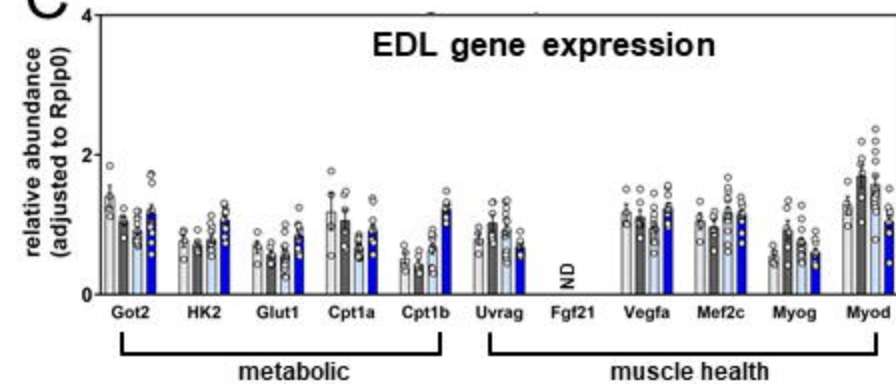**D**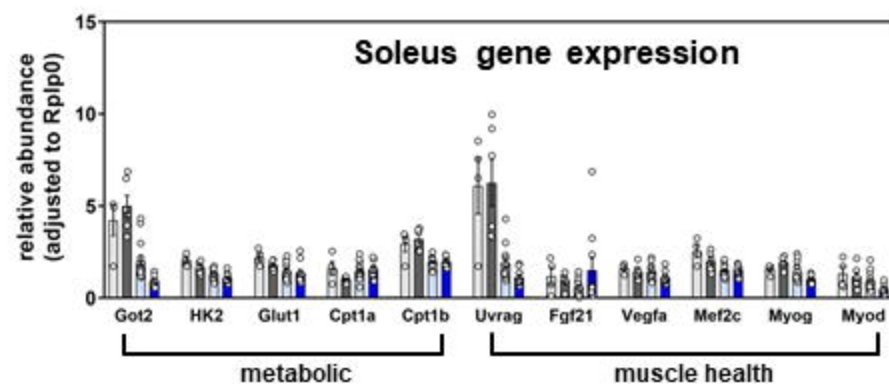

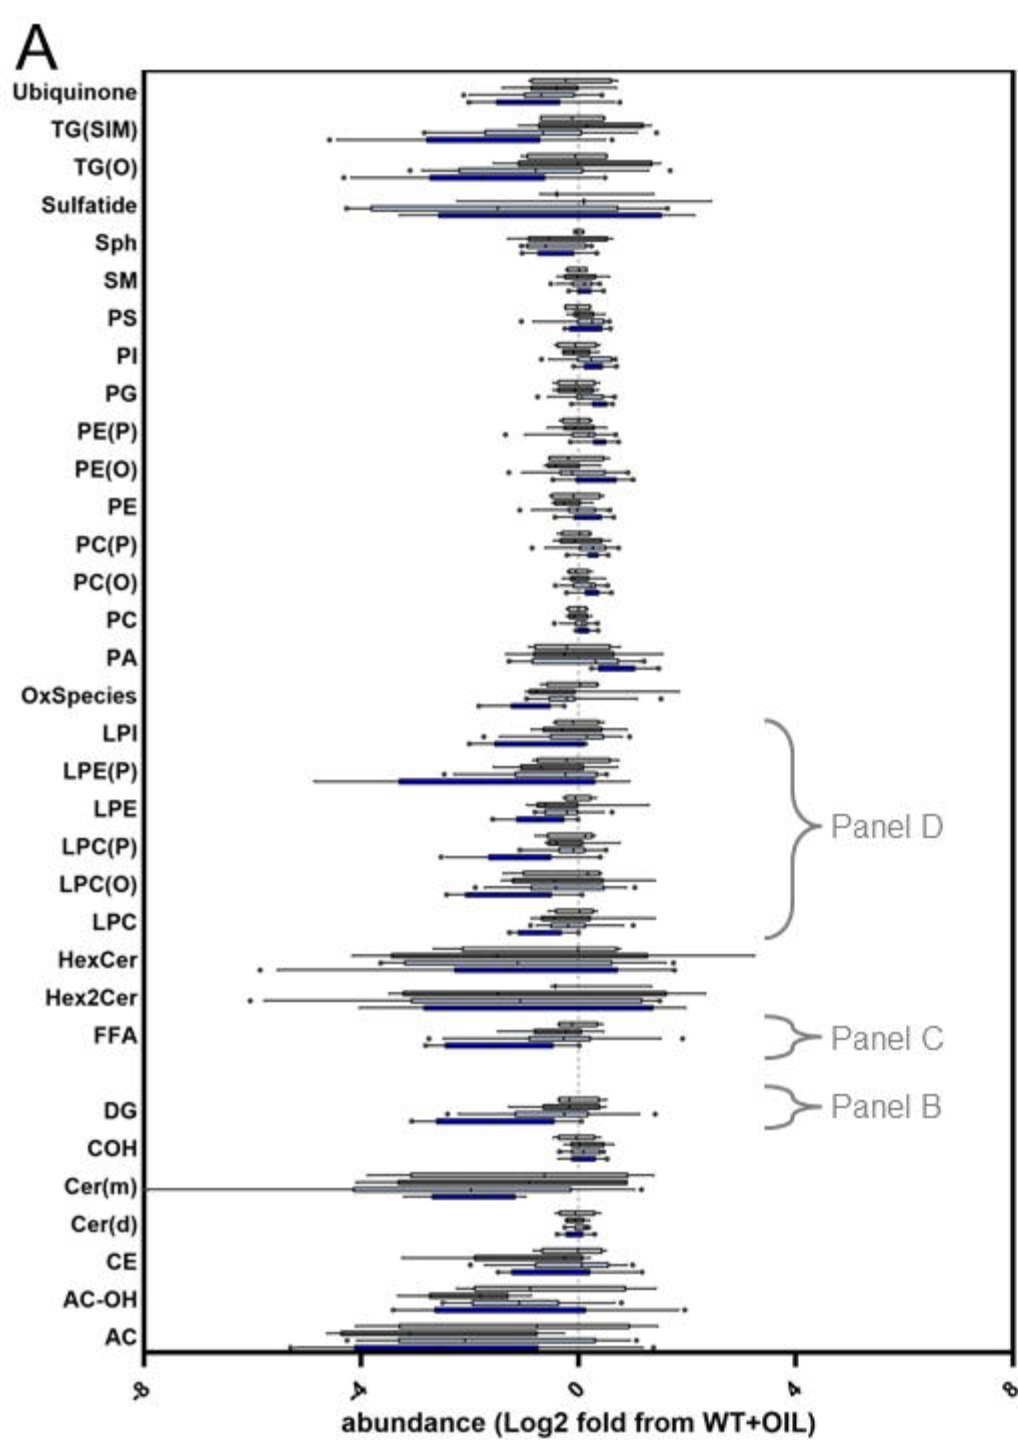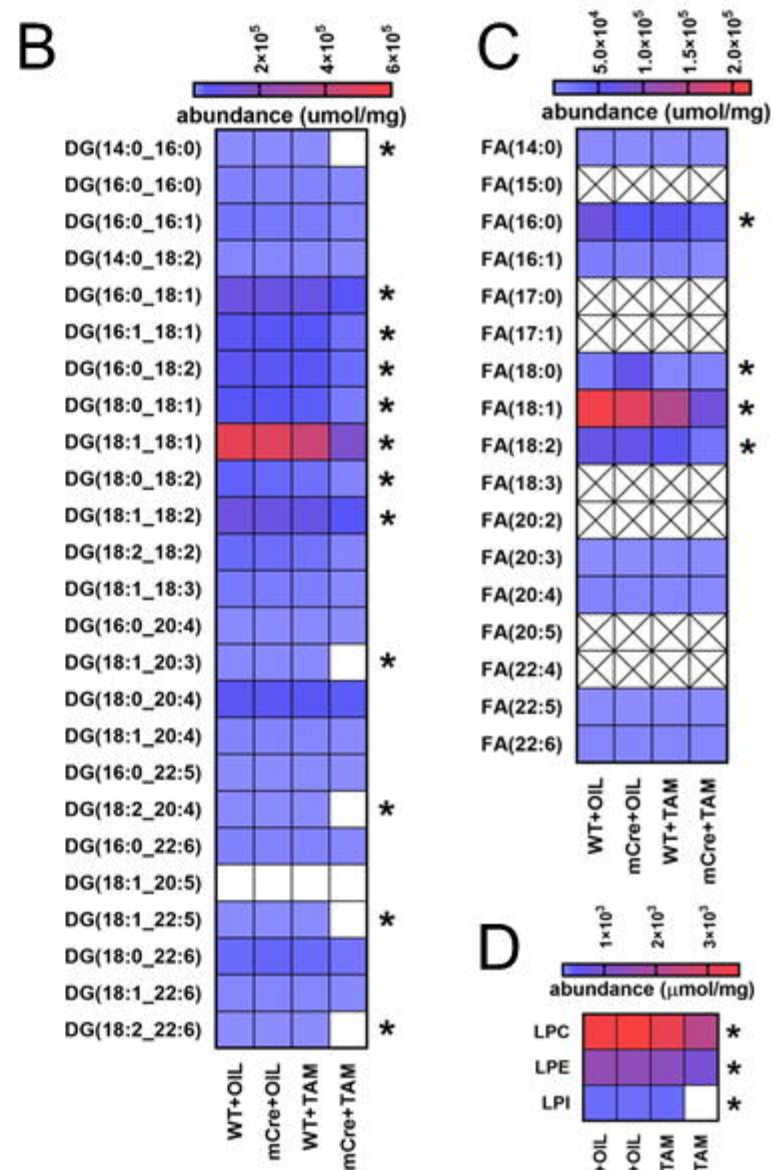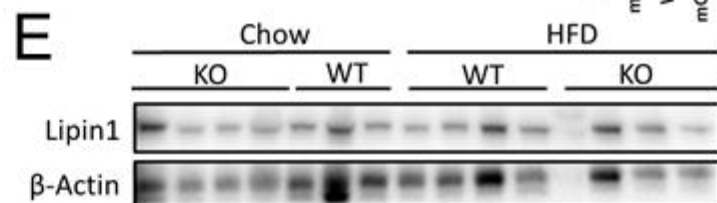

Source: https://biorxiv.org/content/10.1101/2021.05.20.443346v1.full.pdf
